# Supplementary material
Source: PubMed Central journal article supplement (PMC5807871)
Supplement: ml7b00363_si_001.pdf [file ml7b00363_si_001.pdf]

## Supporting Information

### Non-Acidic Chemotype Possessing N-Acylated Piperidine Moiety as Potent Farnesoid X Receptor (FXR) Antagonists

Naoki Teno<sup>a, b,\*</sup>, Yukiko Yamashita<sup>c</sup>, Yusuke Iguchi<sup>c</sup>, Ko Fujimori<sup>d</sup>, Mizuho Une<sup>a, c</sup>, Tomoko Nishimaki-Mogami<sup>c</sup>, Takie Hiramoto<sup>a</sup>, Keigo Gohda<sup>f</sup>

<sup>a</sup> Graduate School of Pharmaceutical Sciences, <sup>b</sup> Faculty of Clinical Nutrition, <sup>c</sup> Faculty of Pharmaceutical Sciences, Hiroshima International University, 5-1-1, Hirokoshingai, Kure, Hiroshima 737-0112, Japan

<sup>d</sup> Faculty of Pharmaceutical Sciences, Osaka University of Pharmaceutical Sciences, 4-20-1 Nasahara, Takatsuki, Osaka 569-1094, Japan

<sup>e</sup> National Institute of Health Sciences, Kamiyoga 1-18-1, Setagaya-ku, Tokyo 158-8501, Japan

<sup>f</sup> Computer-aided Molecular Modeling Research Center, Kansai (Camm-Kansai), 3-32-302, Tsuto-Otsuka, Nishinomiya 663-8241, Japan

\*Address for correspondence: Prof. Naoki Teno, 5-1-1, Hirokoshingai, Kure, Hiroshima 737-0112, Japan, Tel.: +81 823 73 8942; Fax: +81 823 73 8981, e-mail: [n-teno@ps.hirokoku-u.ac.jp](mailto:n-teno@ps.hirokoku-u.ac.jp)

#### Content

1. Analogue **10** and reference compound **1** inhibit the effect of GW4064 in TR FRET binding assay (Figure S1)
2. The affinity between **10** and nine nuclear receptors, TGR5 (Figure S2)
3. Effect of **10** on PXR target gene expressions (Figure S3)
4. Experimental procedure and analytical data of analogues **7-11** (Scheme S1)
5. Experimental procedure and analytical data of analogues **12** and **15** (Scheme S2)
6. Experimental procedure and analytical data of analogues **13** and **16** (Scheme S3)
7. Experimental procedure and analytical data of analogues **14** and **17** (Scheme S4)
8. Analytical data of **6** and **1**
9. Purity determination (**1** and **6-17**)
10. Antagonistic rate of **6-17** at each concentration in luciferase reporter gene assay (Table S1)

11. Experimental procedure for biology
12. References

# 1. Analogue 10 and reference compound 1 inhibit the effect of GW4064 in TR FRET binding assay

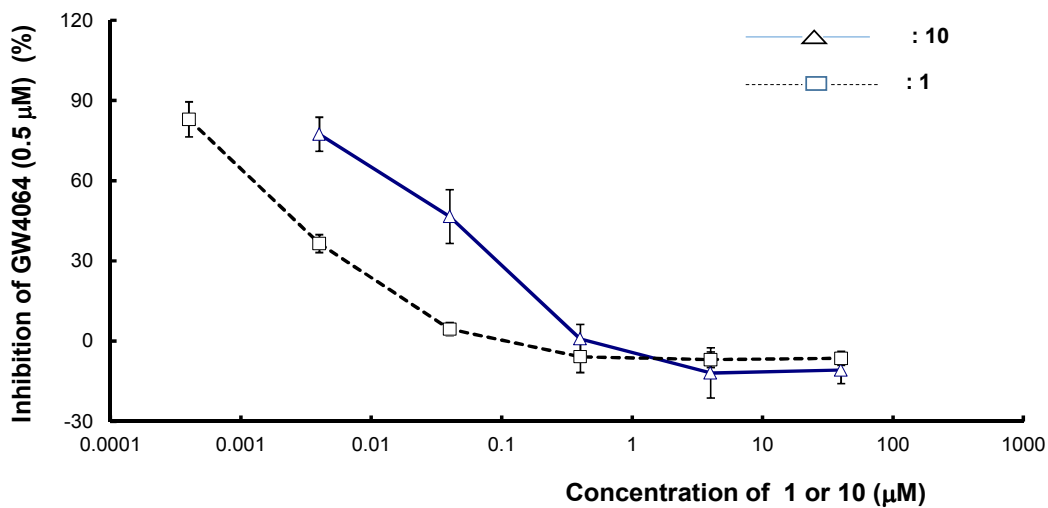

**Figure S1.** Analogue 10 and reference compound 1 inhibit the effect of GW4064 in TR-FRET binding assay. The method of the assay has been described in the section of experimental procedure.

## 2. The affinity between **10** and nine nuclear receptors, TGR5

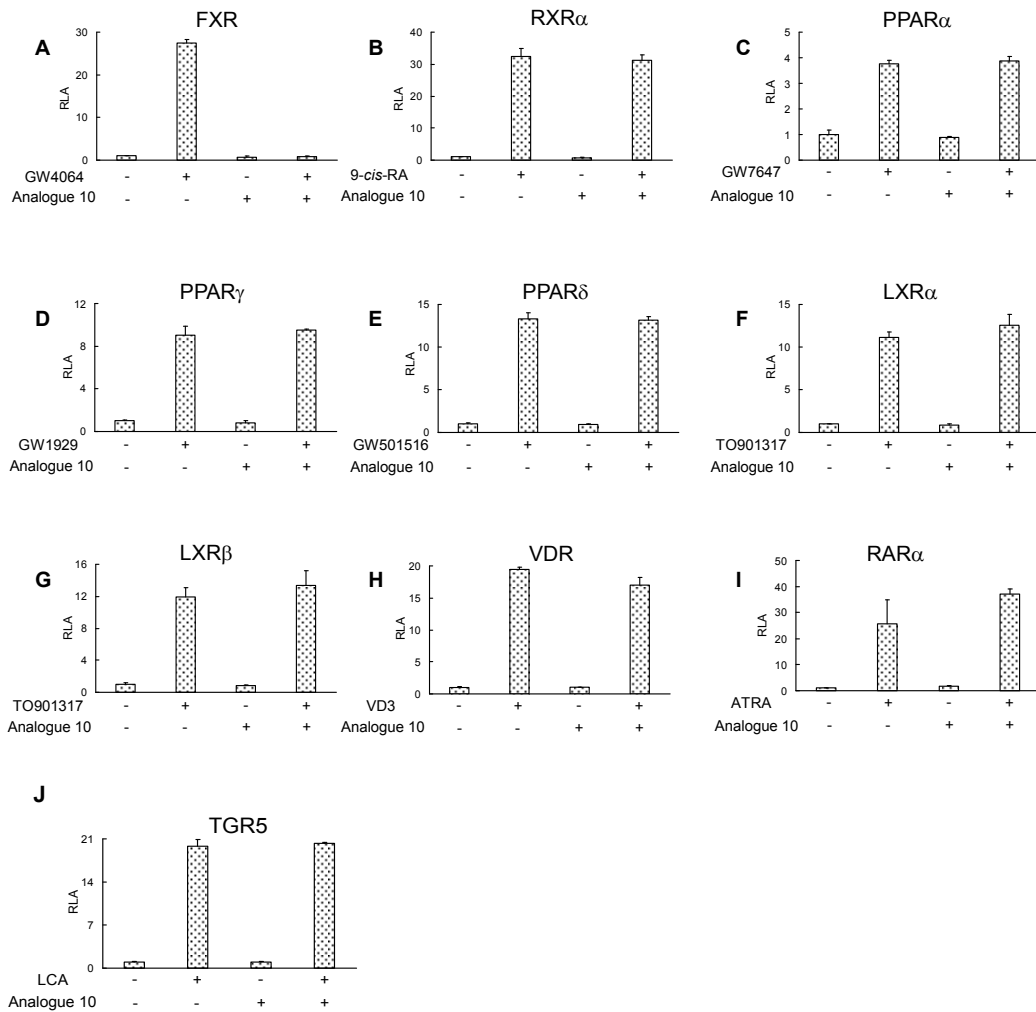

**Figure S2.** The affinity between **10** and nine nuclear receptors, TGR5. (A) FXR agonist GW4064 (100 nM), (B) RXR $\alpha$  agonist 9-*cis*-retinoic acid (9-*cis*-RA 100 nM), (C) PPAR $\alpha$  agonist GW7647 (50 nM), (D) PPAR $\gamma$  agonist GW1929 (50 nM), (E) PPAR $\delta$  agonist GW501516 (50 nM), (F and G) LXR $\alpha$  and  $\beta$  agonist TO901317 (50 nM), (H) VDR agonist 1,25(OH)<sub>2</sub>VD3 (VD3, 100 nM), (I) RAR $\alpha$  agonist all-trans retinoic acid (ATRA, 100 nM) and (J) TGR5 agonist lithocholic acid (LCA, 200 nM) were as the positive controls. The concentration of analogue **10** was 1  $\mu$ M in these experiments. RLA: Relative luciferase activity.

### 3. Effect of **10** on PXR target gene expressions.

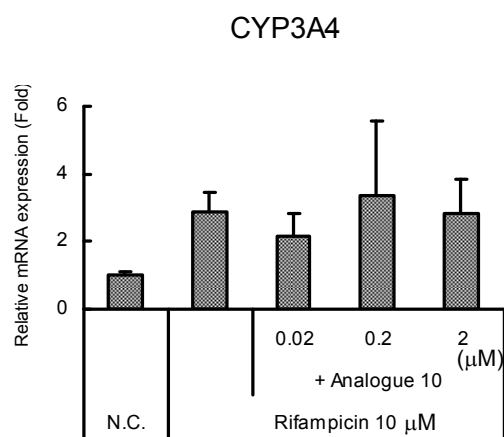

**Figure S3.** Effect of **10** on PXR target gene expressions. The mRNA expression level of CYP3A4 as PXR target gene was not changed by **10**. HepG2 cells were treated with different concentrations of **10** in the presence of 10 μM Rifampicin for 48 hr. N.C.: Negative control.

## Experimentals

**General.** All chemicals were purchased from Tokyo Chemical Industry Co., Ltd. or Wako Pure Chemical Industries, Ltd. and used without further purification. Amino acid derivative and the coupling reagents were purchased from Watanabe Chemical Industries, Ltd. or Peptide Institute, Inc. <sup>1</sup>H-NMR experiments were recorded on a JMTC-600 (JEOL Ltd.) 600 NMR spectrometer with CDCl<sub>3</sub>, DMSO-*d*<sub>6</sub>, or D<sub>2</sub>O as solvents. Chemical shifts are expressed in parts per million (ppm, δ) and referred to the solvent signal. HRMS spectra were recorded on the AccuTOF (JMS-T100LC) equipped with an electrospray ion source (JEOL Ltd.). The analytical HPLC system consisted of a SHINADZU CBM-20A System Controller and a SHIMADZU Pump Unit LC-20AT, a SHIMADZU In-Line Degasser DGU-20A3R, a SHIMADZU SPD-20A Absorbance Detector, a SHIMADZU FCV-11AL Valve Unit and a SHIMADZU FRC-10A Fraction Collector (SHIMADZU Corporation). The absorbance detector was operated at 254 nm. The mobile phase for preparation and analysis was a combination of water (A) and acetonitrile (B), both containing 0.1% TFA, and the flow rate was 8 ml/min and 1 ml/min, respectively. TSK gel ODS columns (21.5 x 300 mm for preparation and 4.6 x 150 mm for analysis, TOSOH Corporation) were used.

## 4. Experimental procedure and analytical data of analogues 7-11

**Scheme S1. Synthesis of Analogues 7-11<sup>a</sup>**

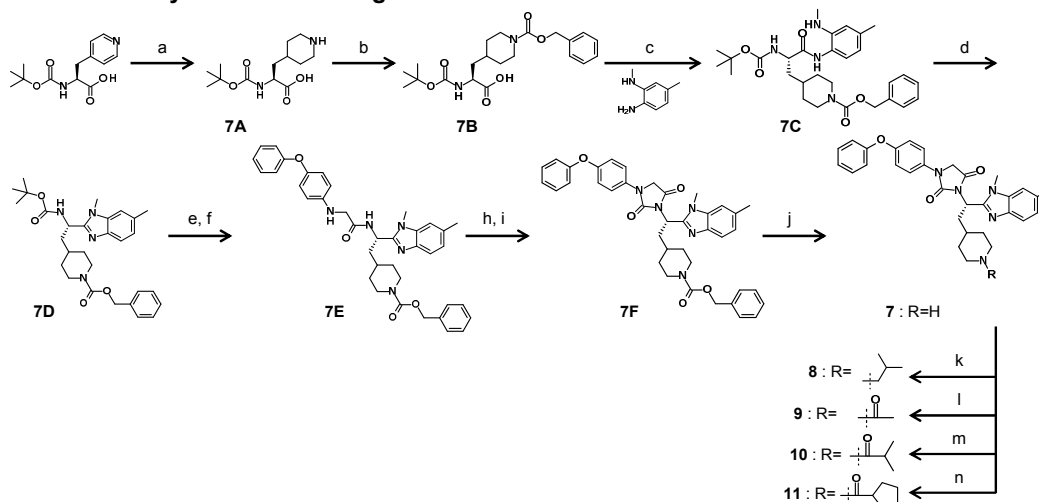

<sup>a</sup>Reagents and conditions: (a) PTO<sub>2</sub>, H<sub>2</sub>, 1 M HCl, MeOH, 24 h, rt; (b) Z-OSu, NaHCO<sub>3</sub>, CH<sub>3</sub>CN/H<sub>2</sub>O, 15 h, rt; (c) N2,4-Dimethyl benzene-1,2-diamine, HOAt, WSCI.HCl, DMF, 15 h, -20 °C → rt; (d) CH<sub>3</sub>COOH, 3 h, 80 °C; (e) 4 M HCl/dioxane, 1 h, rt; (f) 2-(4-Phenoxyanilino) acetic acid hydrochloride, HOAt, WSCI.HCl, 15 h, 0 °C → rt; (h) 4-Nitrophenyl chloroformate, Et<sub>3</sub>N, THF, 15 h, rt; (i) 1 M TBAF, THF, 3 h, rt; (j) 10 % Pd/C, H<sub>2</sub>, MeOH, 3 h, rt; (k) 1-Bromo-2-methylpropane, K<sub>2</sub>CO<sub>3</sub>, DMF, 15 h, rt; (l) Acetic anhydride, DMF, Et<sub>3</sub>N, 3 h, rt; (m) Isobutyric anhydride, DMF, Et<sub>3</sub>N, 3 h, rt; (n) Cyclopentanecarboxylic acid, HOAt, WSCI.HCl, DMF, 15 h, 0 °C → rt;

**(2S)-2-(tert-Butoxycarbonylamino)-3-(4-piperidyl)propanoic acid hydrochloride (7A):** A suspension of platinum (IV) oxide (72 mg, 0.32 mmol) and (2S)-2-(tert-butoxycarbonylamino)-3-(4-pyridyl)propanoic acid (500 mg, 1.88 mmol) in MeOH (20 ml) and 1M HCl (1.88 ml) was stirred under a hydrogen atmosphere at room temperature for 24 h. The mixture was filtered through celite and the filtrate evaporated to afford **7A** in 98 % yield. The product was used in the next reaction without further purification. Rf=0.22 (CH<sub>2</sub>Cl<sub>2</sub>/MeOH=6/4), <sup>1</sup>H NMR (600 MHz, DMSO-d<sub>6</sub>): δ 8.78 (br, 1H), 7.09 (m, 1H), 3.91 (m, 1H), 3.23 (m, 5H), 2.81 (m, 2H), 1.83-1.56 (m, 4H), 1.39 (s, 9H), 1.29 (m, 1H). HRMS (ESI/TOF) m/z: [M + H]<sup>+</sup> Calcd for C<sub>13</sub>H<sub>25</sub>N<sub>2</sub>O<sub>4</sub> 273.18143 ; Found 273.17973.

**(2S)-3-(1-Benzyloxycarbonyl-4-piperidyl)-2-(tert-butoxycarbonylamino)propanoic acid (7B):** A mixture of **7A** (1.16 g, 3.77 mmol), N-(benzyloxycarbonyloxy)succinimide (0.98 g, 3.95 mmol), and NaHCO<sub>3</sub> (0.95 g, 11.3 mmol) in CH<sub>3</sub>CN/H<sub>2</sub>O (30 ml/25 ml) was stirred at ambient temperature for 15 h. The organic solvent was removed *in vacuo* and the aqueous layer was washed with ether. The aqueous layer was collected and adjusted pH to 3 with 2 M HCl and the white precipitation was extracted with EtOAc. The combined extracts were washed with H<sub>2</sub>O and brine, dried over MgSO<sub>4</sub> and concentrated under reduced pressure to give **7B** in 90 % yield. Rf=0.45 (CH<sub>2</sub>Cl<sub>2</sub>/MeOH=9/1), <sup>1</sup>H NMR (600 MHz, CDCl<sub>3</sub>): δ 9.80 (br, 1H), 7.38-7.32 (m, 5H), 5.12 (s, 2H), 4.92 (d, 1H), 6.88 (d, J=8.0 Hz, 1H), 4.37 (m, 1H), 4.12 (br, 2H), 2.12 (br, 2H), 1.78-1.59 (m, 4H), 1.45 (s, 9H), 1.15 (m, 2H). HRMS (ESI/TOF) m/z: [M + Na]<sup>+</sup> Calcd for C<sub>21</sub>H<sub>30</sub>N<sub>2</sub>O<sub>6</sub>Na 429.20016 ; Found 429.20033.

**Benzyl 4-[(2S)-2-(tert-butoxycarbonylamino)-3-[4-methyl-2-(methylamino)anilino]-3-oxo-propyl]piperidine-1-carboxylate (7C):** To a solution of **7B** (500 mg, 1.23 mmol) in DMF (3 ml), N<sub>2</sub>,4-dimethylbenzene-1,2-diamine<sup>1</sup> (168 mg, 1.23 mmol) in DMF (3 ml) was added at -20 °C. Subsequently, HOAt (184 mg, 1.35 mmol) and WSCI.HCl (354 mg, 1.85 mmol) were added to the former solution at -20 °C and stirred for 15 h at ambient temperature. The reaction mixture was quenched with sat.NH<sub>4</sub>Cl and extracted with EtOAc. The combined extracts were washed with H<sub>2</sub>O and brine, dried over MgSO<sub>4</sub> and concentrated under reduced pressure. The residue was purified by silica gel column chromatography to give **7C** in 71 % yield. Rf=0.50 (*n*-Hexane/EtOAc=1/1), <sup>1</sup>H NMR (600 MHz, DMSO-d<sub>6</sub>): δ 9.14 (s, 1H), 7.39-7.34 (m, 5H), 7.16 (d, J=6.0 Hz, 1H), 6.88 (d, J=6.6 Hz, 1H), 6.41 (s, 1H), 6.38 (d, J=7.8 Hz, 1H), 5.08 (s, 2H), 4.90 (d, J=4.8 Hz, 1H), 4.10 (m, 1H), 4.02 (m, 2H), 2.83 (m, 1H), 2.75 (m, 1H), 2.71 (d, J=4.2

Hz, 3H), 2.25 (s, 3H), 1.72 (m, 2H), 1.56 (d, J=4.8 Hz, 3H), 1.42 (s, 9H), 1.06 (m, 2H). HRMS (ESI/TOF) m/z: [M + H]<sup>+</sup> Calcd for C<sub>29</sub>H<sub>41</sub>N<sub>4</sub>O<sub>5</sub> 525.30769 ; Found 525.30737.

**Benzyl 4-[(2S)-2-(tert-butoxycarbonylamino)-2-(1,6-dimethylbenzimidazol-2-yl)ethyl]piperidine-1-carboxylate (7D):** **7C** (450 mg, 0.86 mmol) was dissolved in CH<sub>3</sub>COOH (15 ml) at room temperature and stirred for 3 h at 80 °C. The reaction mixture was evaporated and quenched by addition of sat.NaHCO<sub>3</sub>. The mixture was extracted with EtOAc, and organic layer was washed successively with H<sub>2</sub>O and brine, dried over MgSO<sub>4</sub> and concentrated under reduced pressure. The residue was purified by silica gel column chromatography to give **7D** in 94 % yield. Rf=0.45 (*n*-Hexane/EtOAc=1/1), <sup>1</sup>H NMR (600 MHz, DMSO-d<sub>6</sub>): δ 7.45 (t, J=8.4 Hz, 2H), 7.40-7.32 (m, 6H), 7.01 (d, J=7.8 Hz, 1H), 5.07 (s, 2H), 5.00 (m, 1H), 4.03-4.00 (m, 2H), 3.74 (s, 3H), 2.76 (m, 2H), 2.45 (s, 3H), 1.92 (m, 1H), 1.84 (m, 2H), 1.67 (m, 1H), 1.54 (m, 1H), 1.39 (s, 9H), 1.15-1.06 (m, 2H). HRMS (ESI/TOF) m/z: [M + H]<sup>+</sup> Calcd for C<sub>29</sub>H<sub>39</sub>N<sub>4</sub>O<sub>4</sub> 507.29713 ; Found 507.29714.

**Benzyl 4-[(2S)-2-(1,6-dimethylbenzimidazol-2-yl)-2-[[2-(4-phenoxyanilino)acetyl]amino]ethyl]piperidine-1-carboxylate (7E):** To an amorphous powder of **7D** (400 mg, 0.79 mmol), 4M HCl/dioxane (3.95 ml, 15.8 mmol) was added at room temperature and the mixture was stirred for 1 h at ambient temperature. Ether was added to the reaction mixture to yield the precipitate. The product was filtered and dried over for 3h *in vacuo*. The product in DMF (3 ml) was added to a solution of 2-[(4-phenoxyphenyl)amino]acetic acid hydrochloride<sup>2</sup> (221 mg, 0.79 mmol) and triethylamine (332 μl, 2.37 mmol) in DMF (2 ml) at 0 °C. Subsequently, HOAt (118 mg, 0.87 mmol) and WSCI.HCl (228 mg, 1.19 mmol) were added to the former solution at 0 °C and stirred for 15h at ambient temperature. The reaction mixture was quenched with sat.NH<sub>4</sub>Cl and extracted with EtOAc. The combined extracts were washed with H<sub>2</sub>O and brine, dried over MgSO<sub>4</sub> and concentrated under reduced pressure. The residue was purified by silica gel column chromatography to give **7E** in 74 % yield. Rf=0.45 (*n*-Hexane/EtOAc=1/4), <sup>1</sup>H NMR (600 MHz, DMSO-d<sub>6</sub>): δ 8.43 (d, J=9.0 Hz, 1H), 7.44 (d, J=7.2 Hz, 1H), 7.45-7.24 (m, 8H), 6.97 (m, 2H), 6.79 (d, J=8.4 Hz, 4H), 6.55 (d, J=9.0 Hz, 2H), 5.94 (m, 1H), 5.33 (m, 1H), 5.03 (s, 2H), 3.91 (brs, 2H), 3.69-3.66 (m, 2H), 3.66 (s, 3H), 2.63 (m, 2H), 2.40 (s, 3H), 1.91 (m, 1H), 1.79 (m, 2H), 1.52 (m, 1H), 1.42 (m, 1H), 1.07 (m, 1H), 0.98 (m, 1H). HRMS (ESI/TOF) m/z: [M + Na]<sup>+</sup> Calcd for C<sub>38</sub>H<sub>41</sub>N<sub>5</sub>O<sub>4</sub>Na 654.30562 ; Found 654.30510.

**Benzyl 4-[(2S)-2-(1,6-dimethylbenzimidazol-2-yl)-2-[2,5-dioxo-3-(4-phenoxyphenyl)imidazolidin-1-yl]ethyl]piperidine-1-carboxylate (7F):** At room temperature, triethylamine



(406  $\mu$ l, 2.90 mmol) was added to **7E** (365 mg, 0.58 mmol) in dist.THF (5 ml) under a N<sub>2</sub> atmosphere. After stirring for 5 min, to the mixture, 4-nitrophenyl chloroformate (234 mg, 1.16 mmol) was added at ambient temperature and stirred for 15 h under the same conditions. The reaction mixture was quenched with sat.NaHCO<sub>3</sub> and extracted with EtOAc. The combined extracts were washed H<sub>2</sub>O and brine, dried over MgSO<sub>4</sub> and concentrated under reduced pressure. To the residue in THF (3 ml), TBAF (1M THF solution) (1.74 ml, 1.74 mmol) was added at ambient temperature and stirred for 3 h under the same conditions. The reaction mixture was quenched with sat.NH<sub>4</sub>Cl and extracted with EtOAc. The combined extracts were washed with sat.NaHCO<sub>3</sub>, H<sub>2</sub>O and brine, dried over MgSO<sub>4</sub> and concentrated under reduced pressure. The residue was purified by silica gel column chromatography to give **7F** in 71 % yield. Rf=0.70 (*n*-Hexane/EtOAc=1/2), <sup>1</sup>H NMR (600 MHz, DMSO-d<sub>6</sub>):  $\delta$  7.65 (d, J=8.4 Hz, 2H), 7.52 (d, J=7.8 Hz, 1H), 7.40-7.33 (m, 8H), 7.13 (t, J=8.4 Hz, 1H), 7.09 (d, J=7.8 Hz, 2H), 7.03 (d, J=8.4 Hz, 1H), 6.98 (d, J=7.8 Hz, 2H), 5.58 (brs, 1H), 5.08 (s, 2H), 4.60 (s, 2H), 4.02 (brs, 2H), 3.68 (s, 3H), 2.84 (m, 1H), 2.77 (m, 1H), 2.52 (m, 1H), 2.45 (m, 3H), 2.33 (m, 1H), 1.93 (m, 1H), 1.69 (m, 1H), 1.63 (m, 1H), 1.19 (m, 1H), 1.14 (m, 1H). HRMS (ESI/TOF) m/z: [M + H]<sup>+</sup> Calcd for C<sub>39</sub>H<sub>40</sub>N<sub>5</sub>O<sub>5</sub> 658.30294 ; Found 658.30318.

**3-[(1S)-1-(1,6-Dimethylbenzimidazol-2-yl)-2-(4-piperidyl)ethyl]-1-(4-phenoxyphenyl)imidazolidine-2,4-dione (7):** To **7F** (200 mg, 0.30 mmol) and 10 % Pd/C (65.5 mg), was added dist.MeOH (10 ml) and hydrogenated under a hydrogen atmosphere for 3 h at ambient temperature. The solution was filtered and concentrated to provide a white solid. The products were purified by HPLC (column: TSK gel ODS-120T,  $\Phi$  21.5 x 300 mm, eluent CH<sub>3</sub>CN containing 0.1% TFA/H<sub>2</sub>O containing 0.1% TFA) to give **7** in 79% yield, Rf=0.20 (CH<sub>2</sub>Cl<sub>2</sub>/MeOH=8/2), <sup>1</sup>H NMR (600 MHz, D<sub>2</sub>O):  $\delta$  7.49 (d, J=9.0 Hz, 1H), 7.35 (s, 1H), 7.28 (d, J=9.0 Hz, 1H), 7.17 (d, J=9.0 Hz, 2H), 7.10 (t, J=8.4 Hz, 2H), 6.91 (t, J=7.2 Hz, 1H), 6.74 (d, J=9.0 Hz, 2H), 6.68 (d, J=8.4 Hz, 2H), 5.77 (dd, J=10.2, 4.8 Hz, 1H), 4.35 (q, J=18.0 Hz, 2H), 3.78 (s, 3H), 3.28 (brt, J=13.8 Hz, 2H), 2.78 (m, 2H), 2.65 (m, 1H), 2.31 (s, 3H), 2.13 (m, 1H), 2.03 (brd, J=13.8 Hz, 1H), 1.82 (brd, J=14.4 Hz, 1H), 1.60 (m, 1H), 1.44 (m, 1H), 1.35 (m, 1H). <sup>13</sup>C NMR (600 MHz, D<sub>2</sub>O):  $\delta$  171.0, 163.6, 157.0, 154.9, 154.1, 146.59, 146.58, 138.7, 133.1, 132.1, 130.6, 129.6, 124.6, 122.6, 119.9, 119.3, 114.2, 112.6, 51.3, 44.2, 44.1, 43.1, 34.4, 31.9, 30.1, 28.9, 27.8, 21.4. HRMS (ESI/TOF) m/z: [M + Na]<sup>+</sup> Calcd for C<sub>31</sub>H<sub>33</sub>N<sub>5</sub>O<sub>3</sub>Na 546.24811 ; Found 546.24669.

**3-[(1S)-1-(1,6-Dimethylbenzimidazol-2-yl)-2-(1-isobutyl-4-piperidyl)ethyl]-1-(4-phenoxyphenyl)imidazolidine-2,4-dione (8):** To a solution of **7** (55.0 mg, 0.11 mmol) in DMF (3 ml), K<sub>2</sub>CO<sub>3</sub> (30.4 mg, 0.22 mmol) and 1-bromo-2-methylpropane (16.4 mg, 0.12 mmol) were added

at ambient temperature and stirred for 15 h. The reaction mixture was quenched with sat.  $\text{NH}_4\text{Cl}$  and extracted with EtOAc. The combined extracts were washed with  $\text{H}_2\text{O}$  and brine, dried over  $\text{MgSO}_4$  and concentrated under reduced pressure. The residue was purified by silica gel column chromatography to give **8** in 30% yield.  $R_f = 0.35$  (EtOAc/MeOH = 9/1),  $^1\text{H}$  NMR (600 MHz,  $\text{CDCl}_3$ ):  $\delta$  7.82 (d,  $J=7.8$  Hz, 1H), 7.45 (d,  $J=9.0$  Hz, 2H), 7.33 (m, 3H), 7.23 (brs, 1H), 7.11 (t,  $J=7.8$  Hz, 1H), 7.00 (d,  $J=9.0$  Hz, 2H), 6.97 (d,  $J=8.4$  Hz, 2H), 5.75 (t,  $J=6.6$  Hz, 1H), 4.42 (brs, 2H), 3.95 (s, 3H), 3.59 (d,  $J=11.4$  Hz, 1H), 3.53 (d,  $J=10.8$  Hz, 1H), 2.90-2.57 (m, 7H), 2.53 (s, 3H), 2.06 (quint.,  $J=6.6$  Hz, 1H), 2.13 (d,  $J=13.2$  Hz, 1H), 1.93 (m, 3H), 0.99 (t,  $J=7.2$  Hz, 6H).  $^{13}\text{C}$  NMR (600 MHz,  $\text{CDCl}_3$ ):  $\delta$  167.9, 161.6, 157.0, 154.5, 152.7, 147.2, 147.1, 137.2, 133.3, 131.9, 129.9, 128.2, 123.5, 120.8, 119.73, 119.66, 118.8, 116.5, 110.6, 64.7, 53.1, 50.3, 43.9, 34.5, 31.4, 30.2, 28.2, 27.8, 23.9, 21.9, 20.32, 20.25., HRMS (ESI/TOF)  $m/z$ :  $[\text{M} + \text{Na}]^+$  Calcd for  $\text{C}_{35}\text{H}_{41}\text{N}_5\text{O}_3\text{Na}$  602.31071 ; Found 602.30996.

**3-[(1S)-2-(1-Acetyl-4-piperidyl)-1-(1,6-dimethylbenzimidazol-2-yl)ethyl]-1-(4-phenoxyphenyl)imidazolidine-2,4-dione (9)**: To a solution of **7** (159 mg, 0.24 mmol) in DMF (3 ml), triethylamine (67.3  $\mu\text{l}$ , 0.48 mmol) and acetic anhydride (24.5  $\mu\text{l}$ , 0.26 mmol) were added at ambient temperature and stirred for 3 h. The reaction mixture was quenched with sat.  $\text{NH}_4\text{Cl}$  and extracted with EtOAc. The combined extracts were washed with  $\text{H}_2\text{O}$  and brine, dried over  $\text{MgSO}_4$  and concentrated under reduced pressure. The residue was purified by silica gel column chromatography to give **9** in 87% yield.  $R_f = 0.80$  (EtOAc/MeOH = 9/1),  $^1\text{H}$  NMR (600 MHz,  $\text{CDCl}_3$ ):  $\delta$  7.71 (dd,  $J=8.4$ , 4.8 Hz, 1H), 7.51 (dd,  $J=8.4$ , 3.6 Hz, 2H), 7.34 (t,  $J=7.8$  Hz, 2H), 7.11 (t,  $J=7.8$  Hz, 2H), 7.10 (t,  $J=8.4$  Hz, 1H), 7.04 (d,  $J=9.0$  Hz, 2H), 6.98 (d,  $J=8.4$  Hz, 2H), 5.61 (m, 1H), 4.61 (t,  $J=14.4$  Hz, 1H), 4.33 (s, 2H), 3.81 (m, 1H), 3.76 (s, 3H), 3.01 (td,  $J=12.6$ , 6.6 Hz, 1H), 2.87 (td,  $J=10.2$ , 4.8 Hz, 0.5H), 2.68 (m, 0.5H), 2.60 (m, 0.5H), 2.52 (m, 1H), 2.49 (s, 3H), 2.39 (m, 0.5H), 2.08 (s, 3H), 2.01 (m, 1H), 1.80 (m, 1H), 1.64 (m, 1H), 1.32-1.20 (m, 2H).  $^{13}\text{C}$  NMR (600 MHz,  $\text{CDCl}_3$ ):  $\delta$  168.8, 167.6, 167.5, 157.1, 154.1, 153.5, 149.6, 149.5, 140.2, 136.1, 133.3, 132.5, 129.8, 124.0, 123.5, 120.2, 119.97, 119.94, 119.8, 118.6, 109.2, 49.8, 46.4, 45.5, 41.5, 36.2, 33.0, 32.8, 32.2, 31.8, 31.0, 30.0, 21.9, 21.5. HRMS (ESI/TOF)  $m/z$ :  $[\text{M} + \text{H}]^+$  Calcd for  $\text{C}_{33}\text{H}_{36}\text{N}_5\text{O}_4$  566.27673 ; Found 566.27373.

**3-[(1S)-1-(1,6-Dimethylbenzimidazol-2-yl)-2-[1-(2-methylpropanoyl)-4-piperidyl]ethyl]-1-(4-phenoxyphenyl)imidazolidine-2,4-dione (10)**: To a solution of **7** (60.0 mg, 0.09 mmol) in DMF (3 ml), triethylamine (25.5  $\mu\text{l}$ , 0.18 mmol) and isobutyric anhydride (18.2  $\mu\text{l}$ , 0.11 mmol) were added at ambient temperature and stirred for 3 h. The reaction mixture was quenched with sat.  $\text{NH}_4\text{Cl}$  and extracted with EtOAc. The combined extracts were washed with  $\text{H}_2\text{O}$  and brine, dried over  $\text{MgSO}_4$  and concentrated under reduced pressure. The residue was purified by silica

gel column chromatography to give **10** in 77% yield. Rf = 0.50 (*n*-hexane/EtOAc = 1/2), <sup>1</sup>H NMR (600 MHz, CDCl<sub>3</sub>): δ 7.75 (d, J=7.2 Hz, 1H), 7.51 (dd, J=7.8, 3.0 Hz, 2H), 7.33 (t, J=7.8 Hz, 2H), 7.13 (brs, 2H), 7.11 (t, J=7.8 Hz, 1H), 7.04 (d, J=9.0 Hz, 2H), 6.98 (d, J=7.8 Hz, 2H), 5.61 (m, 1H), 4.65 (t, J=15.0 Hz, 1H), 4.33 (s, 2H), 3.94 (brd, J=13.2 Hz, 1H), 3.78 (s, 3H), 3.00 (m, 1H), 2.90 (m, 0.5H), 2.79 (quint., J=6.0 Hz, 1H), 2.67-2.62 (m, 1H), 2.53 (m, 1H), 2.50 (s, 3H), 2.37 (m, 0.5H), 2.04 (brt, J=15.0 Hz, 1H), 1.81 (m, 1H), 1.63 (m, 1H), 1.32-1.18 (m, 2H), 1.10 (m, 6H)., <sup>13</sup>C NMR (600 MHz, CDCl<sub>3</sub>): δ 175.3, 167.7, 167.6, 157.1, 154.2, 153.4, 149.4, 149.2, 140.2, 135.8, 133.7, 132.5, 129.8, 124.4, 123.5, 120.3, 119.8, 119.7, 118.6, 109.3, 49.8, 45.4, 41.8, 36.1, 33.2, 33.0, 32.5, 31.8, 31.1, 30.1, 21.9, 19.6, 19.3. HRMS (ESI/TOF) m/z: [M + H]<sup>+</sup> Calcd for C<sub>35</sub>H<sub>40</sub>N<sub>5</sub>O<sub>4</sub> 594.30803 ; Found 594.30726.

**3-[(1S)-2-[1-(Cyclopentanecarbonyl)-4-piperidyl]-1-(1,6-dimethylbenzimidazol-2-yl)ethyl]-1-(4-phenoxyphenyl)imidazolidine-2,4-dione (11):** Compound **7** (55.0 mg, 0.11 mmol) in DMF (1 ml) was added to a solution of cyclopentanecarboxylic acid (13.7 mg, 0.12 mmol) in DMF (2 ml) at 0 °C. Subsequently, HOAt (17.7 mg, 0.13 mmol) and WSCI.HCl (32.6 mg, 0.17 mmol) were added to the former solution at 0 °C and stirred for 15h at ambient temperature. The reaction mixture was quenched with sat.NH<sub>4</sub>Cl and extracted with EtOAc. The combined extracts were washed with H<sub>2</sub>O and brine, dried over MgSO<sub>4</sub> and concentrated under reduced pressure. The residue was purified by silica gel column chromatography to give **11** in 21 % yield. Rf=0.80 (EtOAc), <sup>1</sup>H NMR (600 MHz, CDCl<sub>3</sub>): δ 7.73 (d, J=4.8 Hz, 1H), 7.51 (dd, J=8.4, 4.2 Hz, 2H), 7.33 (t, J=7.2 Hz, 2H), 7.11 (brs, 2H), 7.10 (brs, 1H), 7.04 (d, J=9.0 Hz, 2H), 6.98 (d, J=8.4 Hz, 2H), 5.61 (m, 1H), 4.64 (t, J=16.8 Hz, 1H), 4.33 (d, J=7.8 Hz, 2H), 3.97 (d, J=12.6 Hz, 1H), 3.76 (s, 3H), 2.98 (m, 1H), 2.90 (m, 0.5H), 2.88 (quint., J=7.2 Hz, 1H), 2.68 (m, 0.5H), 2.60 (m, 0.5H), 2.51 (m, 1H), 2.49 (s, 3H), 2.37 (m, 0.5H), 2.01 (m, 1H), 1.81-1.55 (m, 10H), 1.30-1.17 (m, 2H). <sup>13</sup>C NMR (600 MHz, CDCl<sub>3</sub>): δ 174.3, 167.7, 167.5, 157.1, 154.1, 153.4, 149.6, 149.4, 139.8, 136.0, 133.4, 132.5, 129.83, 129.81, 124.2, 123.5, 120.21, 120.19, 119.8, 118.6, 109.2, 49.8, 45.5, 41.9, 41.1, 36.1, 33.2, 33.1, 33.0, 32.4, 31.9, 31.1, 30.2, 30.0. HRMS (ESI/TOF) m/z: [M + Na]<sup>+</sup> Calcd for C<sub>37</sub>H<sub>41</sub>N<sub>5</sub>O<sub>4</sub>Na 642.30562 ; Found 642.30572.



1H), 7.38-7.30 (m, 8H), 5.20-5.14 (m, 4H), 4.16 (m, 2H), 3.84 (s, 3H), 2.77 (br, 2H), 2.00-1.94 (m, 3H), 1.67-1.61 (m, 2H), 1.45 (s, 9H), 1.29-1.19 (m, 2H). HRMS (ESI/TOF) m/z: [M + Na]<sup>+</sup> Calcd for C<sub>28</sub>H<sub>36</sub>N<sub>4</sub>O<sub>4</sub>Na 515.26342 ; Found 515.26206.

**Benzyl 4-[(2S)-2-(1-methylbenzimidazol-2-yl)-2-[[2-(4-phenoxyanilino)acetyl]amino]ethyl]piperidine-1-carboxylate (12C):** To an amorphous powder of **12B** (350 mg, 0.71 mmol), 4M HCl/dioxane (1.7 ml, 7.1 mmol) was added at room temperature and the mixture was stirred for 1 h at ambient temperature. Ether was added to the reaction mixture to yield the precipitate. The product was filtrated and dried over for 3h *in vacuo*. The product in DMF (8 ml) was added to a solution of 2-[(4-phenoxyphenyl)amino]acetic acid hydrochloride<sup>2</sup> (200 mg, 0.71 mmol) and triethylamine (110 µl, 0.78 mmol) in DMF (8 ml) at 0 °C. Subsequently, HOAt (110 mg, 0.85 mmol) and WSCI.HCl (160 mg, 0.85 mmol) were added to the former solution at 0 °C and stirred for 15 h at ambient temperature. The reaction mixture was quenched with sat.NH<sub>4</sub>Cl and extracted with EtOAc. The combined extracts were washed with H<sub>2</sub>O and brine, dried over MgSO<sub>4</sub> and concentrated under reduced pressure. The residue was purified by silica gel column chromatography to give **12C** in 25 % yield. Rf=0.75 (*n*-Hexane/EtOAc=1/4), <sup>1</sup>H NMR (600 MHz, CDCl<sub>3</sub>): δ 7.72 (d, J=7.9 Hz, 1H), 7.38-7.32 (m, 11H), 7.04 (t, J=7.6 Hz, 1H), 6.91 (d, J=8.7 Hz, 4H), 6.58 (d, J=8.6 Hz, 2H), 5.61-5.58 (m, 1H), 5.13 (s, 2H), 4.21 (m, 3H), 3.87 (s, 3H), 3.84-3.83 (br, 2H), 2.72 (m, 2H), 2.02-1.90 (m, 3H), 1.49 (m, 2H), 1.18 (br, 2H). HRMS (ESI/TOF) m/z: [M + Na]<sup>+</sup> Calcd for C<sub>37</sub>H<sub>39</sub>N<sub>5</sub>O<sub>4</sub>Na 640.28997 ; Found 640.29003.

**Benzyl 4-[(2S)-2-[2,5-dioxo-3-(4-phenoxyphenyl)imidazolidin-1-yl]-2-(1-methylbenzimidazol-2-yl)ethyl]piperidine-1-carboxylate (12D):** At room temperature, triethylamine (100 µl, 0.71 mmol) was added to **12C** (110 mg, 0.18 mmol) in dist.THF (5 ml) under a N<sub>2</sub> atmosphere. After stirring for 5 min, to the mixture, 4-nitrophenyl chloroformate (72 mg, 0.36 mmol) was added at ambient temperature and stirred for 15 h under the same conditions. The reaction mixture was quenched with sat.NaHCO<sub>3</sub> and extracted with EtOAc. The combined extracts were washed H<sub>2</sub>O and brine, dried over MgSO<sub>4</sub> and concentrated under reduced pressure. To the residue in THF (3 ml), TBAF (1M THF solution) (0.71 ml, 0.71 mmol) was added at ambient temperature and stirred for 15 h under the same conditions. The reaction mixture was quenched with sat.NH<sub>4</sub>Cl and extracted with EtOAc. The combined extracts were washed with sat.NaHCO<sub>3</sub>, H<sub>2</sub>O and brine, dried over MgSO<sub>4</sub> and concentrated under reduced pressure. The residue was purified by silica gel column chromatography to give **12D** in 70 % yield. Rf=0.62 (*n*-Hexane/EtOAc=1/4), <sup>1</sup>H NMR (600 MHz, CDCl<sub>3</sub>): δ 7.84 (d, J=7.4 Hz, 1H), 7.51-7.50 (m, 2H), 7.36-7.28 (m, 10H), 7.10 (t, J=7.4 Hz, 1H), 7.04 (d, J=9.1 Hz, 2H), 6.97 (d,

J=7.7 Hz, 2H), 5.63-5.60 (m, 1H), 5.11 (s, 2H), 4.32 (s, 2H), 4.17 (m, 2H), 3.80 (s, 3H), 2.76 (m, 3H), 2.42 (m, 2H), 1.97 (br, 1H), 1.74 (br, 1H), 1.31-1.22 (m, 2H). HRMS (ESI/TOF) m/z: [M + H]<sup>+</sup> Calcd for C<sub>38</sub>H<sub>38</sub>N<sub>5</sub>O<sub>5</sub> 644.28729 ; Found 644.28529.

**3-[(1S)-2-(1-Acetyl-4-piperidyl)-1-(1-methylbenzimidazol-2-yl)ethyl]-1-(4-phenoxyphenyl)imidazolidine-2,4-dione (12):** To **12D** (45 mg, 0.07 mmol) and 10 % Pd/C (50 mg), was added dist.MeOH (3 ml) and hydrogenated under a hydrogen atmosphere for 3 h at ambient temperature. The solution was filtered and concentrated to provide a white solid. To a solution of the obtained solid in CH<sub>2</sub>Cl<sub>2</sub> (3 ml), triethylamine (59 μl, 0.42 mmol) and acetic anhydride (33 μl, 0.35 mmol) were added at ambient temperature and stirred for 3 h. The reaction mixture was quenched with sat. NH<sub>4</sub>Cl and extracted with EtOAc. The combined extracts were washed with H<sub>2</sub>O and brine, dried over MgSO<sub>4</sub> and concentrated under reduced pressure. The residue was purified by silica gel column chromatography to give **12** in 43% yield. R<sub>f</sub>=0.80 (EtOAc/MeOH=9/1), <sup>1</sup>H NMR (600 MHz, CDCl<sub>3</sub>): δ 7.84 (t, J=7.2 Hz, 1H), 7.51 (dd, J=8.4, 3.6 Hz, 2H), 7.35-7.27 (m, 5H), 7.11 (t, J=6.6 Hz, 1H), 7.04 (d, 9.0 Hz, 2H), 6.98 (d, J=8.4 Hz, 2H), 5.62 (td, J=10.2, 5.4 Hz, 1H), 4.62 (t, J=14.4 Hz, 1H), 4.33 (d, J=6.6 Hz, 2H), 3.82 (m, 1H), 3.80 (s, 3H), 3.02 (td, J=13.2, 5.4 Hz, 1H), 2.89 (m, 0.5H), 2.69 (m, 0.5H), 2.60 (m, 0.5H), 2.53 (q, J=12.6 Hz, 1H), 2.40 (m, 0.5H), 2.08 (s, 3H), 2.02 (m, 1H), 1.81 (m, 1H), 1.62 (m, 1H), 1.33-1.19 (m, 2H)., <sup>13</sup>C NMR (600 MHz, CDCl<sub>3</sub>): δ 168.8, 167.6, 167.5, 157.1, 154.1, 153.4, 150.1, 150.0, 142.1, 135.9, 132.5, 129.8, 123.5, 123.2, 122.4, 120.4, 120.1, 119.8, 118.6, 109.3, 49.7, 46.4, 45.5, 41.5, 36.1, 32.9, 32.8, 32.1, 31.7, 31.0, 21.5., HRMS (ESI/TOF) m/z: [M + Na]<sup>+</sup> Calcd for C<sub>32</sub>H<sub>33</sub>N<sub>5</sub>O<sub>4</sub>Na 574.24302 ; Found 574.24371.

**3-[(1S)-1-(1-Methylbenzimidazol-2-yl)-2-[1-(2-methylpropanoyl)-4-piperidyl]ethyl]-1-(4-phenoxyphenyl)imidazolidine-2,4-dione (15):** To **12D** (45 mg, 0.07 mmol) and 10 % Pd/C (50 mg), was added dist.MeOH (3 ml) and hydrogenated under a hydrogen atmosphere for 3 h at ambient temperature. The solution was filtered and concentrated to provide a white solid. To a solution of the obtained solid in CH<sub>2</sub>Cl<sub>2</sub> (3 ml), triethylamine (59 μl, 0.42 mmol) and isobutylic anhydride (58 μl, 0.35 mmol) were added at ambient temperature and stirred for 3 h. The reaction mixture was quenched with sat. NH<sub>4</sub>Cl and extracted with EtOAc. The combined extracts were washed with H<sub>2</sub>O and brine, dried over MgSO<sub>4</sub> and concentrated under reduced pressure. The residue was purified by silica gel column chromatography to give **15** in 26% yield. R<sub>f</sub>=0.42 (EtOAc), <sup>1</sup>H NMR (600 MHz, CDCl<sub>3</sub>): δ 7.85 (t, J=5.4 Hz, 1H), 7.51 (brd, J=6.0 Hz, 2H), 7.35-7.27 (m, 5H), 7.11 (t, J=6.6 Hz, 1H), 7.04 (d, J=9.0 Hz, 2H), 6.98 (d, J=9.0 Hz, 2H), 5.63 (q, J=6.0 Hz, 1H), 4.66 (brt, J=15.0 Hz, 1H), 4.33 (d, J=6.0 Hz, 2H), 3.94 (brd, J=12.0 Hz,

1H), 3.80 (s, 3H), 3.00 (m, 1H), 2.89 (m, 0.5H), 2.79 (quint., J=6.0 Hz, 1H), 2.71 (m, 0.5H), 2.61 (m, 0.5H), 2.52 (q, J=12.0 Hz, 1H), 2.39 (m, 0.5H), 2.03 (brt, J=9.6 Hz, 1H), 1.81 (m, 1H), 1.66 (m, 1H), 1.30-1.20 (m, 2H), 1.11 (dd, J=13.2, 6.6 Hz, 6H). <sup>13</sup>C NMR (600 MHz, CDCl<sub>3</sub>): δ 175.2, 167.7, 167.5, 157.1, 154.1, 153.4, 150.2, 150.0, 142.1, 135.9, 132.5, 129.8, 123.4, 123.2, 122.4, 120.4, 120.2, 119.8, 118.6, 109.3, 49.7, 45.5, 41.8, 36.2, 33.1, 33.0, 32.5, 31.9, 31.1, 30.1, 19.6, 19.3., HRMS (ESI/TOF) m/z: [M + H]<sup>+</sup> Calcd for C<sub>34</sub>H<sub>38</sub>N<sub>5</sub>O<sub>4</sub> 580.29238 ; Found 580.29457.

## 6. Experimental procedure and analytical data of analogues 13 and 16

Scheme S3. Synthesis of Analogues 13 and 16<sup>a</sup>

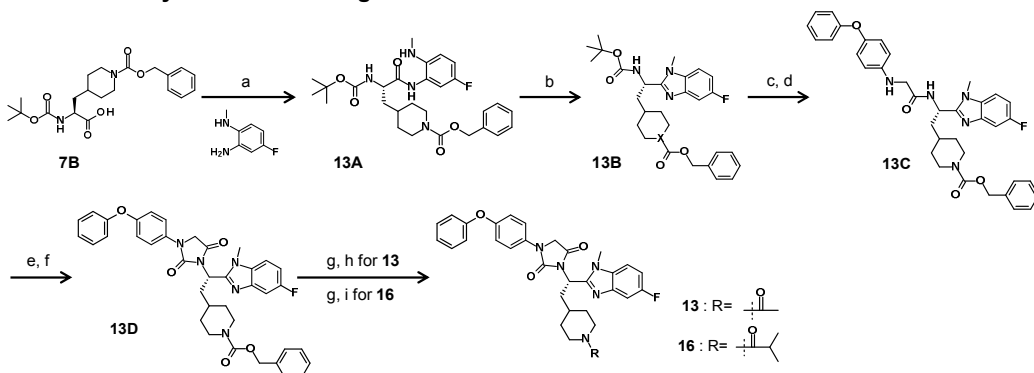

<sup>a</sup>Reagents and conditions: (a) 4-Fluoro-N1-methyl-benzene-1,2-diamine, HOAt, WSCI.HCl, DMF, 15 h, -20 °C -> rt; (b) CH<sub>3</sub>COOH, 2 h, 80 °C; (c) 4 M HCl/dioxane, 1 h, rt; (d) 2-(4-Phenoxyanilino) acetic acid hydrochloride, HOAt, WSCI.HCl, 15 h, 0 °C -> rt; (e) 4-Nitrophenyl chloroformate, Et<sub>3</sub>N, THF, 15 h, rt; (f) 1 M TBAF, THF, 3 h, rt; (g) 10 % Pd/C, H<sub>2</sub>, MeOH, 3 h, rt; (h) Acetic anhydride, CH<sub>2</sub>Cl<sub>2</sub>, Et<sub>3</sub>N, 3 h, rt; (i) Isobutyric anhydride, CH<sub>2</sub>Cl<sub>2</sub>, Et<sub>3</sub>N, 3 h, rt;

**Benzyl 4-[(2S)-2-(tert-butoxycarbonylamino)-3-[5-fluoro-2-(methylamino)anilino]-3-oxo-propyl]piperidine-1-carboxylate (13A):** To a solution of **7B** (1.0 g, 2.46 mmol) in CH<sub>3</sub>CN (30 ml), 4-fluoro-N2-methyl-benzene-1,2-diamine<sup>4</sup> (0.34 g, 2.46 mmol) was added at -20 °C. Subsequently, HOAt (0.35 g, 2.7 mmol) and WSCI.HCl (0.56 g, 2.95 mmol) were added to the former solution at -20 °C and stirred for 15 h at ambient temperature. The reaction mixture was quenched with sat.NH<sub>4</sub>Cl and extracted with EtOAc. The combined extracts were washed with H<sub>2</sub>O and brine, dried over MgSO<sub>4</sub> and concentrated under reduced pressure. The residue was purified by silica gel column chromatography to give **13A** in 49 % yield. R<sub>f</sub>=0.42 (*n*-Hexane/EtOAc=1/1), <sup>1</sup>H NMR (600 MHz, CDCl<sub>3</sub>): δ 7.91 (s, 1H), 7.37-7.36 (m, 5H), 7.32-7.31 (m, 2H), 8.87-6.84 (m, 1H), 6.68 (br, 1H), 5.13 (s, 2H), 4.91 (br, 1H), 4.21-4.20 (m, 3H), 3.69 (br, 1H), 2.80 (s, 3H), 2.78 (m, 2H), 1.91-1.72 (m, 4H), 1.47 (s, 9H), 1.25 (m, 2H). HRMS (ESI/TOF) m/z: [M + H]<sup>+</sup> Calcd for C<sub>28</sub>H<sub>38</sub>F<sub>1</sub>N<sub>4</sub>O<sub>5</sub> 529.28262 ; Found 529.28265.

**Benzyl 4-[(2S)-2-(tert-butoxycarbonylamino)-2-(5-fluoro-1-methyl-benzimidazol-2-yl)ethyl]piperidine-1-carboxylate (13B):** **13A** (0.64 g, 1.2 mmol) was dissolved in CH<sub>3</sub>COOH (10 ml) at room temperature and stirred for 2 h at 80 °C. The reaction mixture was evaporated and quenched by addition of sat.NaHCO<sub>3</sub>. The mixture was extracted with EtOAc, and organic layer was washed successively with H<sub>2</sub>O, and brine, dried over MgSO<sub>4</sub> and concentrated under reduced pressure. The residue was purified by silica gel column chromatography to give **13B** in 98 % yield. R<sub>f</sub>=0.22 (*n*-Hexane/Ether=1/3), <sup>1</sup>H NMR (600 MHz, CDCl<sub>3</sub>): δ 7.43-7.31 (m, 6H), 7.26-7.25 (m, 1H), 7.07-7.03 (m, 1H), 5.15-5.11 (m, 4H), 4.14 (br, 2H), 3.81 (s, 3H), 2.75 (m,



2H), 1.95-1.88 (m, 3H), 1.60 (m, 2H), 1.43 (s, 9H), 1.24 (m, 2H). HRMS (ESI/TOF) m/z: [M + H]<sup>+</sup> Calcd for C<sub>28</sub>H<sub>36</sub>F<sub>1</sub>N<sub>4</sub>O<sub>4</sub> 511.27206 ; Found 511.27401.

**Benzyl 4-[(2S)-2-(5-fluoro-1-methyl-benzimidazol-2-yl)-2-[[2-(4-phenoxyanilino)acetyl]amino]ethyl]piperidine-1-carboxylate (13C):** To an amorphous powder of **13B** (0.59 g, 1.16 mmol), 4M HCl/dioxane (2.9 ml, 11.6 mmol) was added at room temperature and the mixture was stirred for 1 h at ambient temperature. Ether was added to the reaction mixture to yield the precipitate. The product was filtrated and dried over for 3 h *in vacuo*. The product in DMF (15 ml) was added to a solution of 2-[(4-phenoxyphenyl)amino]acetic acid hydrochloride<sup>2</sup> (0.32 g, 1.16 mmol) and triethylamine (0.36 ml, 2.55 mmol) in DMF (15 ml) at 0 °C. Subsequently, HOAt (0.18 g, 1.4 mmol) and WSCI.HCl (0.27 g, 1.4 mmol) were added to the former solution at 0 °C and stirred for 15 h at ambient temperature. The reaction mixture was quenched with sat.NH<sub>4</sub>Cl and extracted with EtOAc. The combined extracts were washed with H<sub>2</sub>O and brine, dried over MgSO<sub>4</sub> and concentrated under reduced pressure. The residue was purified by silica gel column chromatography to give **13C** in 78 % yield. Rf=0.38 (*n*-Hexane/EtOAc=1/2), <sup>1</sup>H NMR (600 MHz, CDCl<sub>3</sub>): δ 7.38-7.31 (m, 8H), 7.26-7.25 (m, 2H), 7.09-7.02 (m, 2H), 6.90 (d, J=8.8 Hz, 4H), 6.56 (d, J=8.8 Hz, 2H), 5.55-5.53 (m, 1H), 5.12 (s, 2H), 4.12 (m, 3H), 3.85 (s, 3H), 3.82-3.79 (m, 2H), 2.71 (br, 2H), 1.99-1.86 (m, 3H), 1.46 (m, 2H), 1.16 (m, 2H). HRMS (ESI/TOF) m/z: [M + H]<sup>+</sup> Calcd for C<sub>37</sub>H<sub>39</sub>F<sub>1</sub>N<sub>5</sub>O<sub>4</sub> 636.29861 ; Found 636.29856.

**Benzyl 4-[(2S)-2-[2,5-dioxo-3-(4-phenoxyphenyl)imidazolidin-1-yl]-2-(5-fluoro-1-methyl-benzimidazol-2-yl)ethyl]piperidine-1-carboxylate (13D):** At room temperature, triethylamine (0.5 ml, 3.6 mmol) was added to **13C** (0.57 g, 0.90 mmol) in dist.THF (15 ml) under a N<sub>2</sub> atmosphere. After stirring for 5 min, to the mixture, 4-nitrophenyl cholofomate (0.36 g, 1.8 mmol) was added at ambient temperature and stirred for 15 h under the same conditions. The reaction mixture was quenched with sat.NaHCO<sub>3</sub> and extracted with EtOAc. The combined extracts were washed H<sub>2</sub>O and brine, dried over MgSO<sub>4</sub> and concentrated under reduced pressure. To the residue in THF (15 ml), TBAF (1M THF solution) (3.6 ml, 3.6 mmol) was added at ambient temperature and stirred for 3 h under the same conditions. The reaction mixture was quenched with sat.NH<sub>4</sub>Cl and extracted with EtOAc. The combined extracts were washed with sat.NaHCO<sub>3</sub>, H<sub>2</sub>O and brine, dried over MgSO<sub>4</sub> and concentrated under reduced pressure. The residue was purified by silica gel column chromatography to give **13D** in 51 % yield. Rf=0.51 (*n*-Hexane/EtOAc=1/2), <sup>1</sup>H NMR (600 MHz, CDCl<sub>3</sub>): δ 7.51-7.50 (m, 3H), 7.36-7.31 (m, 7H), 7.25-7.22 (m, 1H), 7.12-7.10 (m, 1H), 7.07-7.04 (m, 3H), 6.98-6.97 (m, 2H), 5.60-5.58 (m, 1H), 5.12 (s, 2H), 4.33 (s, 2H), 4.22 (br, 2H), 3.79 (s, 3H), 2.76 (m, 3H), 2.39 (m,

1H), 1.97-1.74 (m, 3H), 1.29 (m, 2H). HRMS (ESI/TOF) m/z: [M + H]<sup>+</sup> Calcd for C<sub>38</sub>H<sub>37</sub>F<sub>1</sub>N<sub>5</sub>O<sub>5</sub> 662.27787 ; Found 662.27818.

**3-[(1S)-2-(1-Acetyl-4-piperidyl)-1-(5-fluoro-1-methyl-benzimidazol-2-yl)ethyl]-1-(4-phenoxyphenyl)imidazolidine-2,4-dione (13):** To **13D** (290 mg, 0.44 mmol) and 10 % Pd/C (80 mg), was added dist.MeOH (18 ml) and hydrogenated under a hydrogen atmosphere for 3 h at ambient temperature. The solution was filtered and concentrated to provide a white solid (3-[(1S)-1-(5-fluoro-1-methyl-benzimidazol-2-yl)-2-(4-piperidyl)ethyl]-1-(4-phenoxyphenyl)imidazolidine-2,4-dione) in 91 % yield. <sup>1</sup>H NMR (600 MHz, CDCl<sub>3</sub>): δ 7.52-7.33 (m, 3H), 7.32-7.26 (m, 2H), 7.13-7.10 (m, 1H), 7.11 (t, J=7.4 Hz, 1H), 7.04 (d, J=9.0 Hz, 3H), 6.97 (d, J=8.6 Hz, 2H), 5.63-5.61 (m, 1H), 4.34 (s, 2H), 3.80 (s, 3H), 3.49 (s, 2H), 3.08 (t, J=11.6 Hz, 2H), 2.86-2.80 (m, 1H), 2.58 (t, J=11.7 Hz, 2H), 2.40-2.37 (m, 1H), 1.96-1.94 (m, 1H), 1.75-1.73 (m, 1H), 1.46 (br, 1H), 1.32-1.12 (m, 2H). To a solution of (3-[(1S)-1-(5-fluoro-1-methyl-benzimidazol-2-yl)-2-(4-piperidyl)ethyl]-1-(4-phenoxyphenyl)imidazolidine-2,4-dione) (94 mg, 0.18 mmol) in CH<sub>2</sub>Cl<sub>2</sub> (2 ml), triethylamine (62 μl, 0.45 mmol) and acetic anhydride (33 μl, 0.36 mmol) were added at ambient temperature and stirred for 3 h. The reaction mixture was quenched with sat. NH<sub>4</sub>Cl and extracted with EtOAc. The combined extracts were washed with H<sub>2</sub>O and brine, dried over MgSO<sub>4</sub> and concentrated under reduced pressure. The residue was purified by silica gel column chromatography to give **13** in 72% yield. R<sub>f</sub>=0.78 (EtOAc/MeOH=9/1), <sup>1</sup>H NMR (600 MHz, CDCl<sub>3</sub>): δ 7.51 (dd, J=7.8, 4.2 Hz, 3H), 7.33 (t, J=7.8 Hz, 2H), 7.24 (dd, J=9.0, 4.8 Hz, 1H), 7.11 (t, J=7.8 Hz, 1H), 7.06 (brt, J=9.6 Hz, 1H), 7.04 (d, J=9.0 Hz, 2H), 6.98 (d, J=8.4 Hz, 2H), 5.59 (td, J=10.8, 6.0 Hz, 1H), 4.62 (t, J=14.4 Hz, 1H), 4.34 (d, J=7.2 Hz, 2H), 3.81 (m, 1H), 3.79 (s, 3H), 3.02 (td, J=12.0, 6.0 Hz, 1H), 2.89 (m, 0.5H), 2.69 (m, 0.5H), 2.58-2.50 (m, 1.5H), 2.34 (m, 0.5H), 2.08 (s, 3H), 2.01 (m, 1H), 1.08 (m, 1H), 1.61 (brs, 1H), 1.33-1.18 (m, 2H), <sup>13</sup>C NMR (600 MHz, CDCl<sub>3</sub>): δ 168.8, 167.7, 167.6, 160.2, 158.6, 157.1, 154.2, 153.4, 151.6, 151.5, 142.4, 142.3, 132.4, 129.9, 123.5, 120.2, 119.8, 118.7, 111.7, 109.7, 106.2, 49.8, 46.4, 45.5, 41.5, 36.1, 33.0, 32.8, 32.1, 31.8, 31.0, 30.3, 21.5., HRMS (ESI/TOF) m/z: [M + H]<sup>+</sup> Calcd for C<sub>32</sub>H<sub>33</sub>F<sub>1</sub>N<sub>5</sub>O<sub>4</sub> 570.25166 ; Found 570.25301.

**3-[(1S)-1-(5-Fluoro-1-methyl-benzimidazol-2-yl)-2-[1-(2-methylpropanoyl)-4-piperidyl]ethyl]-1-(4-phenoxyphenyl)imidazolidine-2,4-dione (16):** To a solution of (3-[(1S)-1-(5-fluoro-1-methyl-benzimidazol-2-yl)-2-(4-piperidyl)ethyl]-1-(4-phenoxyphenyl)imidazolidine-2,4-dione) (see synthetic procedure for **13**) (43 mg, 0.082 mmol) in CH<sub>2</sub>Cl<sub>2</sub> (2 ml), triethylamine (14 μl, 0.098 mmol) and isobutylic anhydride (15 μl, 0.09 mmol) were added

at ambient temperature and stirred for 3 h. The reaction mixture was quenched with sat.  $\text{NH}_4\text{Cl}$  and extracted with EtOAc. The combined extracts were washed with  $\text{H}_2\text{O}$  and brine, dried over  $\text{MgSO}_4$  and concentrated under reduced pressure. The residue was purified by silica gel column chromatography to give **16** in 44 % yield.  $R_f=0.25$  ( $n$ -Hexane/EtOAc=1/3),  $^1\text{H}$  NMR (600 MHz,  $\text{CDCl}_3$ ):  $\delta$  7.51 (d,  $J=6.0$  Hz, 3H), 7.34 (t,  $J=7.8$  Hz, 2H), 7.24 (dd,  $J=7.8, 4.2$  Hz, 1H), 7.11 (t,  $J=7.8$  Hz, 1H), 7.06 (brt,  $J=10.8$  Hz, 1H), 7.04 (d,  $J=9.0$  Hz, 2H), 6.98 (d,  $J=8.4$  Hz, 2H), 5.60 (m, 1H), 4.66 (t,  $J=15.0$  Hz, 1H), 4.34 (d,  $J=6.0$  Hz, 2H), 3.95 (brd,  $J=12.6$  Hz, 1H), 3.79 (s, 3H), 3.01 (m, 1H), 2.90 (m, 0.5H), 2.79 (quint.,  $J=6.6$  Hz, 1H), 2.69 (m, 0.5H), 2.58-2.51 (m, 1.5H), 2.33 (m, 0.5H), 2.02 (m, 1H), 1.81 (m, 1H), 1.64 (m, 1H), 1.31-1.18 (m, 2H), 1.11 (dd,  $J=12.6, 6.0$  Hz, 6H).,  $^{13}\text{C}$  NMR (600 MHz,  $\text{CDCl}_3$ ):  $\delta$  175.3, 167.6, 166.3, 160.2, 158.6, 157.1, 154.2, 153.4, 151.6, 142.4, 132.4, 129.9, 123.5, 120.2, 119.8, 118.7, 111.6, 109.7, 106.1, 49.8, 45.5, 41.8, 36.1, 33.2, 33.0, 32.5, 31.9, 31.1, 30.3, 30.1, 19.6, 19.3., HRMS (ESI/TOF)  $m/z$ :  $[\text{M} + \text{H}]^+$  Calcd for  $\text{C}_{34}\text{H}_{37}\text{F}_1\text{N}_5\text{O}_4$  598.28296 ; Found 598.28257.

## 7. Experimental procedure and analytical data of analogues 14 and 17

Scheme S4. Synthesis of Analogues 14 and 17<sup>a</sup>

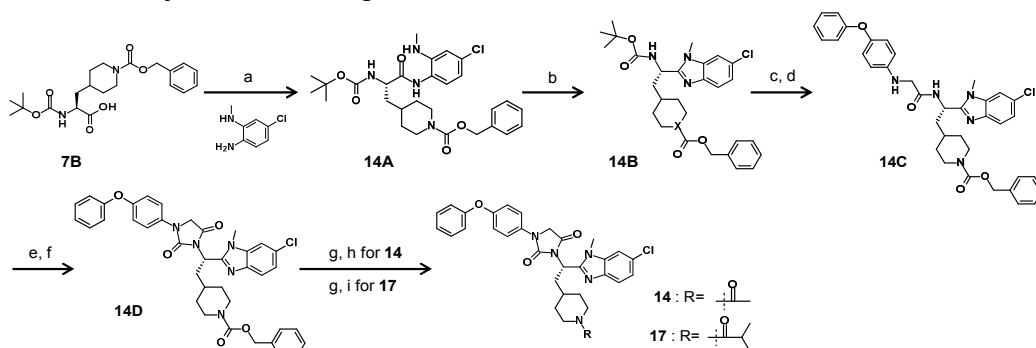

<sup>a</sup>Reagents and conditions: (a) 4-Chloro-N2-methyl-benzene-1,2-diamine, HOAt, WSCI.HCl, DMF, 15 h, -20 °C → rt; (b) CH<sub>3</sub>COOH, 2 h, 80 °C; (c) 4 M HCl/dioxane, 1 h, rt; (d) 2-(4-Phenoxyanilino) acetic acid hydrochloride, HOAt, WSCI.HCl, 15 h, 0 °C → rt; (e) 4-Nitrophenyl chloroformate, Et<sub>3</sub>N, THF, 15 h, rt; (f) 1 M TBAF, THF, 3 h, rt; (g) 30 % HBr/CH<sub>3</sub>COOH, 5 h, rt; (h) Acetic anhydride, DMF, Et<sub>3</sub>N, 3 h, rt; (i) Isobutyric anhydride, DMF, Et<sub>3</sub>N, 3 h, rt.

**Benzyl 4-[(2S)-2-[(tert-butoxy)carbonyl]amino]-2-[4-chloro-2-(methylamino)phenyl]carbamoyl]ethyl]piperidine-1-carboxylate (14A):** To a solution of **7B** (500 mg, 1.23 mmol) in DMF (5 ml), 4-chloro-N1-methyl-benzene-1,2-diamine<sup>5</sup> (193 mg, 1.23 mmol) was added at -20 °C. Subsequently, HOAt (184 mg, 1.35 mmol) and WSCI.HCl (354 mg, 1.85 mmol) were added to the former solution at -20 °C and stirred for 15 h at ambient temperature. The reaction mixture was quenched with sat.NH<sub>4</sub>Cl and extracted with EtOAc. The combined extracts were washed with H<sub>2</sub>O and brine, dried over MgSO<sub>4</sub> and concentrated under reduced pressure. The residue was purified by silica gel column chromatography to give **14A** in 74 % yield. R<sub>f</sub>=0.50 (*n*-Hexane/EtOAc=1/1), <sup>1</sup>H NMR (600 MHz, DMSO-d<sub>6</sub>): δ 9.27 (s, 1H), 7.39-7.33 (m, 5H), 7.21 (d, J=6.6 Hz, 1H), 7.02 (d, J=7.8 Hz, 1H), 6.57 (brs, 2H), 5.29 (m, 1H), 5.08 (s, 2H), 4.09 (m, 1H), 4.02 (m, 2H), 2.83 (m, 2H), 2.72 (d, J=4.8 Hz, 3H), 1.72 (m, 2H), 1.57 (brs, 3H), 1.42 (s, 9H), 1.06 (m, 2H). HRMS (ESI/TOF) m/z: [M + Na]<sup>+</sup> Calcd for C<sub>28</sub>H<sub>37</sub>Cl<sub>1</sub>N<sub>4</sub>O<sub>5</sub>Na 567.23502 ; Found 567.23600.

**Benzyl 4-[(2S)-2-[(tert-butoxy)carbonyl]amino]-2-(6-chloro-1-methyl-1H-1,3-benzodiazol-2-yl)ethyl]piperidine-1-carboxylate (14B) :** **14A** (490 mg, 0.90 mmol) was dissolved in CH<sub>3</sub>COOH (15 ml) at room temperature and stirred for 2 h at 80 °C. The reaction mixture was evaporated and quenched by addition of sat.NaHCO<sub>3</sub>. The mixture was extracted with EtOAc, and organic layer was washed successively with H<sub>2</sub>O, and brine, dried over MgSO<sub>4</sub> and concentrated under reduced pressure. The residue was purified by silica gel column chromatography to give **14B** in 88 % yield. R<sub>f</sub>=0.45 (*n*-Hexane/EtOAc=1/1), <sup>1</sup>H NMR (600

MHz, DMSO-d<sub>6</sub>): δ 7.71 (brs, 1H), 7.60 (d, J=9.0 Hz, 1H), 7.51 (d, J=8.4 Hz, 1H), 7.40-7.33 (m, 5H), 7.20 (d, J=8.4 Hz, 1H), 5.07 (s, 2H), 4.99 (m, 1H), 4.02 (m, 2H), 3.78 (s, 3H), 2.76 (m, 2H), 1.91 (m, 1H), 1.84 (m, 2H), 1.67 (m, 1H), 1.56 (m, 1H), 1.39-1.29 (brs, 9H), 1.08 (m, 2H). HRMS (ESI/TOF) m/z: [M + H]<sup>+</sup> Calcd for C<sub>28</sub>H<sub>36</sub>Cl<sub>1</sub>N<sub>4</sub>O<sub>4</sub> 527.24251 ; Found 527.24350.

**Benzyl 4-[(2S)-2-(6-chloro-1-methyl-1H-1,3-benzodiazol-2-yl)-2-{2-[(4-phenoxyphenyl)amino]acetamido}ethyl]piperidine-1-carboxylate (14C):** To an amorphous powder of **14B** (410 mg, 0.78 mmol), 4M HCl/dioxane (3.90 ml, 15.6 mmol) was added at room temperature and the mixture was stirred for 1 h at ambient temperature. Ether was added to the reaction mixture to yield the precipitate. The product was filtrated and dried over for 3 h *in vacuo*. The product in DMF (5 ml) was added to a solution of 2-[(4-phenoxyphenyl)amino]acetic acid hydrochloride<sup>2</sup> (218 mg, 0.78 mmol) and triethylamine (328 μl, 2.34 mmol) in DMF (3 ml) at 0 °C. Subsequently, HOAt (117 mg, 0.86 mmol) and WSCI.HCl (224 mg, 1.17 mmol) were added to the former solution at 0 °C and stirred for 15 h at ambient temperature. The reaction mixture was quenched with sat.NH<sub>4</sub>Cl and extracted with EtOAc. The combined extracts were washed with H<sub>2</sub>O and brine, dried over MgSO<sub>4</sub> and concentrated under reduced pressure. The residue was purified by silica gel column chromatography to give **14C** in 93 % yield. Rf=0.50 (*n*-Hexane/EtOAc=1/2), <sup>1</sup>H NMR (600 MHz, DMSO-d<sub>6</sub>): δ 8.51 (d, J=9.0 Hz, 1H), 7.71 (d, J=2.4 Hz, 1H), 7.61 (d, J=7.8 Hz, 1H), 7.39-7.33 (m, 5H), 7.28 (t, J=8.4 Hz, 2H), 7.21 (dd, J=7.8, 1.8 Hz, 1H), 7.00 (t, J=7.8 Hz, 1H), 6.83 (d, J=9.0 Hz, 4H), 6.59 (d, J=9.0 Hz, 2H), 5.97 (t, J=6.0 Hz, 1H), 5.38 (m, 1H), 5.06 (s, 2H), 3.96 (m, 2H), 3.77-3.65 (m, 2H), 3.74 (s, 3H), 2.75-2.63 (m, 2H), 1.97 (m, 1H), 1.84 (m, 2H), 1.57 (m, 1H), 1.46 (m, 1H), 1.10 (q, J=7.8 Hz, 1H), 1.02 (q, J=11.4 Hz, 1H). HRMS (ESI/TOF) m/z: [M + H]<sup>+</sup> Calcd for C<sub>37</sub>H<sub>39</sub>Cl<sub>1</sub>N<sub>5</sub>O<sub>4</sub> 652.26906 ; Found 652.26876.

**Benzyl 4-[(2S)-2-(6-chloro-1-methyl-1H-1,3-benzodiazol-2-yl)-2-[2,5-dioxo-3-(4-phenoxyphenyl)imidazolidin-1-yl]ethyl]piperidine-1-carboxylate (14D):** At room temperature, triethylamine (504 μl, 3.60 mmol) was added to **14C** (470 mg, 0.72 mmol) in dist.THF (4 ml) under a N<sub>2</sub> atmosphere. After stirring for 5 min, to the mixture, 4-nitrophenyl cholofomate (290 mg, 1.44 mmol) was added at ambient temperature and stirred for 15 h under the same conditions. The reaction mixture was quenched with sat.NaHCO<sub>3</sub> and extracted with EtOAc. The combined extracts were washed H<sub>2</sub>O and brine, dried over MgSO<sub>4</sub> and concentrated under reduced pressure. To the residue in THF (3 ml), TBAF (1M THF solution) (2.14 ml, 2.14 mmol) was added at ambient temperature and stirred for 3 h under the same conditions. The reaction mixture was quenched with sat.NH<sub>4</sub>Cl and extracted with EtOAc. The combined extracts were

washed with sat. NaHCO<sub>3</sub>, H<sub>2</sub>O and brine, dried over MgSO<sub>4</sub> and concentrated under reduced pressure. The residue was purified by silica gel column chromatography to give **14D** in 74 % yield. Rf=0.80 (*n*-Hexane/EtOAc=1/4), <sup>1</sup>H NMR (600 MHz, DMSO-d<sub>6</sub>): δ 7.75 (d, J=1.8 Hz, 1H), 7.66 (dd, J=13.8, 9.0 Hz, 3H), 7.40-7.33 (m, 7H), 7.23 (dd, J=9.0, 1.8 Hz, 1H), 7.13 (t, J=7.2 Hz, 1H), 7.09 (d, J=9.0 Hz, 2H), 6.98 (d, J=7.8 Hz, 2H), 5.60 (m, 1H), 5.08 (s, 2H), 4.60 (m, 2H), 4.02 (m, 2H), 3.71 (s, 3H), 2.84 (m, 1H), 2.75 (m, 1H), 2.52 (m, 1H), 2.31 (m, 1H), 1.92 (m, 1H), 1.70 (m, 1H), 1.63 (m, 1H), 1.18 (q, J=12.0 Hz, 1H), 1.12 (q, J=11.4 Hz, 1H). HRMS (ESI/TOF) m/z: [M + H]<sup>+</sup> Calcd for C<sub>38</sub>H<sub>37</sub>Cl<sub>1</sub>N<sub>5</sub>O<sub>5</sub> 678.24832 ; Found 678.24874.

**3-[(1S)-2-(1-Acetyl-4-piperidyl)-1-(6-chloro-1-methyl-benzimidazol-2-yl)ethyl]-1-(4-phenoxyphenyl)imidazolidine-2,4-dione (14):** To an amorphous powder of **14D** (160 mg, 0.24 mmol), 30% HBr/CH<sub>3</sub>COOH (471 μl, 2.40 mmol) was added at room temperature and the mixture was stirred for 5 h at ambient temperature. Ether was added to the reaction mixture to yield the precipitate. The product was filtrated and dried over for 3 h *in vacuo*. To the product in DMF (3 ml), acetic anhydride (24.5 μl, 0.26 mmol) and triethylamine (67.2 μl, 0.48 mmol) were added to the former solution at room temperature and stirred for 3 h at ambient temperature. The reaction mixture was quenched with sat. NH<sub>4</sub>Cl and extracted with EtOAc. The combined extracts were washed with H<sub>2</sub>O and brine, dried over MgSO<sub>4</sub> and concentrated under reduced pressure. The residue was purified by silica gel column chromatography to give **14** in 87% yield. Rf=0.35 (EtOAc), <sup>1</sup>H NMR (600 MHz, CDCl<sub>3</sub>): δ 7.76 (brd, J=5.4 Hz, 1H), 7.51 (dd, J=7.8, 4.2 Hz, 2H), 7.35-7.32 (m, 3H), 7.24 (m, 1H), 7.12 (t, J=7.8 Hz, 1H), 7.04 (d, J=9.0 Hz, 2H), 6.98 (d, J=8.4 Hz, 2H), 5.60 (m, 1H), 4.62 (brt, J=13.8 Hz, 1H), 4.34 (d, J=7.2 Hz, 2H), 3.82 (brd, J=12.6 Hz, 1H), 3.77 (s, 3H), 3.03 (m, 1H), 2.88 (m, 0.5H), 2.70 (m, 0.5H), 2.54 (m, 1.5H), 2.35 (m, 0.5H), 2.08 (s, 3H), 2.02 (brt, J=13.2 Hz, 1H), 1.80 (m, 1H), 1.63 (m, 1H), 1.35-1.17 (m, 2H)., <sup>13</sup>C NMR (600 MHz, CDCl<sub>3</sub>): δ 168.8, 167.7, 167.5, 157.0, 154.2, 153.3, 151.0, 150.8, 140.3, 136.5, 132.4, 129.9, 129.2, 123.5, 123.3, 121.2, 120.2, 119.8, 118.7, 109.6, 49.8, 46.4, 45.4, 41.5, 36.1, 32.9, 32.8, 32.1, 31.8, 31.0, 30.3, 21.5., HRMS (ESI/TOF) m/z: [M + Na]<sup>+</sup> Calcd for C<sub>32</sub>H<sub>32</sub>Cl<sub>1</sub>N<sub>5</sub>O<sub>4</sub>Na 608.20405 ; Found 608.20659.

**3-[(1S)-1-(6-Chloro-1-methyl-benzimidazol-2-yl)-2-[1-(2-methylpropanoyl)-4-piperidyl]ethyl]-1-(4-phenoxyphenyl)imidazolidine-2,4-dione (17):** To an amorphous powder of **14D** (60 mg, 0.088 mmol), 30% HBr/CH<sub>3</sub>COOH (345 μl, 1.76 mmol) was added at room temperature and the mixture was stirred for 5 h at ambient temperature. Ether was added to the reaction mixture to yield the precipitate. The product was filtrated and dried over for 3h *in vacuo*. To the product in DMF (3 ml), isobutyric anhydride (16.1 μl, 0.097 mmol) and

triethylamine (24.6  $\mu$ l, 0.176 mmol) were added to the former solution at room temperature and stirred for 3 h at ambient temperature. The reaction mixture was quenched with sat.  $\text{NH}_4\text{Cl}$  and extracted with EtOAc. The combined extracts were washed with  $\text{H}_2\text{O}$  and brine, dried over  $\text{MgSO}_4$  and concentrated under reduced pressure. The residue was purified by silica gel column chromatography to give **17** in 99 % yield.  $R_f=0.55$  (*n*-Hexane/EtOAc = 1/4),  $^1\text{H}$  NMR (600 MHz,  $\text{CDCl}_3$ ):  $\delta$  7.74 (dd,  $J=9.0, 4.2$  Hz, 1H), 7.51 (brd,  $J=7.2$  Hz, 2H), 7.35-7.32 (m, 3H), 7.23 (brd,  $J=7.8$  Hz, 1H), 7.11 (t,  $J=8.4$  Hz, 1H), 7.04 (d,  $J=9.0$  Hz, 2H), 6.98 (d,  $J=9.0$  Hz, 2H), 5.60 (m, 1H), 4.66 (brt,  $J=15.6$  Hz, 1H), 4.34 (d,  $J=5.4$  Hz, 2H), 3.95 (brd,  $J=13.2$  Hz, 1H), 3.76 (s, 3H), 3.00 (m, 1H), 2.88 (m, 0.5H), 2.79 (quint.,  $J=6.6$  Hz, 1H), 2.70 (m, 0.5H), 2.52 (m, 1.5H), 2.35 (m, 0.5H), 2.02 (brt,  $J=13.2$  Hz, 1H), 1.81 (m, 1H), 1.63 (m, 1H), 1.25 (m, 1H), 1.20 (m, 1H), 1.11 (dd,  $J=12.6, 6.0$  Hz, 6H).,  $^{13}\text{C}$  NMR (600 MHz,  $\text{CDCl}_3$ ):  $\delta$  175.3, 167.7, 167.6, 157.1, 154.2, 153.3, 151.1, 151.0, 140.6, 136.5, 132.4, 129.9, 129.1, 123.5, 123.2, 121.3, 120.2, 119.8, 118.7, 109.5, 49.8, 45.5, 41.8, 36.1, 33.2, 33.0, 32.4, 31.9, 31.1, 30.3, 30.1, 19.6, 19.3., HRMS (ESI/TOF)  $m/z$ :  $[\text{M} + \text{H}]^+$  Calcd for  $\text{C}_{34}\text{H}_{37}\text{Cl}_1\text{N}_5\text{O}_4$  614.25341 ; Found 614.25257.

## 8. Analytical data of 6 and 1

**3-[(1S)-2-Cyclohexyl-1-(1,6-dimethyl-1H-1,3-benzodiazol-2-yl)ethyl]-1-(4-phenoxyphenyl)imidazolidine-2,4-dione (6):** The  $^1\text{H}$ -NMR and HRMS data of **6** posted the data reported in the reference 6.  $^{13}\text{C}$  NMR (600 MHz,  $\text{CDCl}_3$ ):  $\delta$  167.7, 157.2, 153.9, 153.7, 150.4, 140.2, 136.1, 133.0, 132.8, 129.8, 123.8, 123.4, 120.2, 119.9, 119.8, 118.6, 109.2, 49.7, 46.0, 37.0, 34.4, 33.5, 32.4, 30.0, 26.4, 26.1, 21.9.  $^1\text{H}$  NMR (600 MHz,  $\text{DMSO}-d_6$ ):  $\delta$  7.65 (d,  $J = 9.0$  Hz, 2H), 7.52 (d,  $J = 8.4$  Hz, 1H), 7.39 (t,  $J = 7.8$  Hz, 2H), 7.33 (s, 1H), 7.13 (t,  $J = 7.8$  Hz, 1H), 7.09 (d,  $J = 9.6$  Hz, 2H), 7.03 (d,  $J = 9.0$  Hz, 1H), 6.98 (d,  $J = 7.2$  Hz, 2H), 5.57–5.55 (m, 1H), 4.61 (d,  $J = 3$  Hz, 2H), 3.68 (s, 3H), 2.48 (m, 1H), 2.45 (s, 3H), 2.26 (m, 1H), 1.97 (m, 1H), 1.70 (m, 3H), 1.63 (m, 1H), 1.39 (m, 1H), 1.25–1.19 (m, 3H), 1.06 (m, 1H), 0.97 (m, 1H). HRMS (ESI/TOF)  $m/z$ :  $[\text{M} + \text{Na}]^+$  Calcd for  $\text{C}_{32}\text{H}_{34}\text{N}_4\text{O}_3\text{Na}$  545.25286 ; Found 545.25300.

**4-[4-({6-[1-tert-Butyl-5-(4-fluorophenyl)-1H-pyrazole-4-amido]-1H-indazol-1-yl}methyl)pi-peridin-1-yl]benzoic acid (1):** **1** was prepared as the reference compound according to the method of reference 7.  $^1\text{H}$  NMR (600 MHz,  $\text{CDCl}_3$ ):  $\delta$  12.25 (brs, 1H), 9.78 (s, 1H), 8.14 (s, 1H), 7.97 (d,  $J=5.4$  Hz, 2H), 7.74 (d,  $J=9.0$  Hz, 2H), 7.64 (d,  $J=8.4$  Hz, 1H), 7.46 (dd,  $J=8.4, 6.6$  Hz, 2H), 7.30 (t,  $J=9.0$  Hz, 2H), 7.19 (d,  $J=9.0$  Hz, 1H), 6.92 (d,  $J=9.0$  Hz, 2H), 4.21 (d,  $J=7.2$  Hz, 2H), 3.88 (d,  $J=13.2$  Hz, 2H), 2.76 (t,  $J=12.0$  Hz, 2H), 2.15 (m, 1H), 1.50 (brd,  $J=10.8$  Hz, 2H), 1.40 (s, 9H), 1.30 (brq,  $J=12.0$  Hz, 2H).,  $^{13}\text{C}$  NMR (600 MHz,  $\text{CDCl}_3$ ):  $\delta$  167.3, 161.5, 160.9, 153.5, 142.7, 139.9, 137.6, 136.5, 133.0, 132.9, 132.5, 130.9, 128.3, 120.8, 119.7, 118.6,

118.4, 115.0, 114.9, 114.7, 113.3, 98.8, 62.1, 53.0, 46.7, 40.0, 36.6, 30.7, 28.7., HRMS  
(ESI/TOF) m/z: [M + Na]<sup>+</sup> Calcd for C<sub>34</sub>H<sub>35</sub>F<sub>1</sub>N<sub>6</sub>O<sub>3</sub>Na 617.26524 ; Found 617.26415.



## 9. Purity determination (1 and 6-17)

Analytical HPLC analyses were performed using the following conditions:

Column name and size; Tsk-GEL, ODS-120T 4.6x150mm. Solvent A: H<sub>2</sub>O/TFA (100/0.1).

Solvent B: CH<sub>3</sub>CN/TFA (100/0.1). Flow rate: 1.0 ml/min. Gradient time: 30 min; 0-30 min  
30 % B → 80 % B . Monitored by UV at 254nm.

**Purity of compounds 1 and 6-17**

| Cpd No. | Purity (%) | Retention time (min) |
|---------|------------|----------------------|
| 1*      | 95.4       | 19.219               |
| 6**     | 98.4       | 25.315               |
| 7       | 99.4       | 13.177               |
| 8       | 96.3       | 15.395               |
| 9       | 99.3       | 16.986               |
| 10      | 99.4       | 19.723               |
| 11      | 99.0       | 21.836               |
| 12      | 99.8       | 15.231               |
| 13      | 99.5       | 15.969               |
| 14      | 98.8       | 18.002               |
| 15      | 99.5       | 18.338               |
| 16      | 99.3       | 18.892               |
| 17      | 98.8       | 20.946               |

\*: Kitamura, S. et al., Jpn. Kokai Tokkyo Koho. JP 2008273847. 13 Nov 2008

\*\* : Teno, N. et al., *Bioorg.Med.Chem.*, 2017, 25, 1787-1794.

## 10. Antagonistic rate of 6-17 at each concentration in luciferase reporter gene assay

**Table S1**

| Cpds | Antagonistic rate (%)               |
|------|-------------------------------------|
| 6*   | 97.6 (4 $\mu$ M)                    |
| 7    | 100 (20 $\mu$ M)                    |
| 8    | 100 (20 $\mu$ M)                    |
| 9    | 100 (0.8 $\mu$ M)                   |
| 10   | 100 ( $1.3 \times 10^{-3}$ $\mu$ M) |
| 11   | 100 ( $1.3 \times 10^{-3}$ $\mu$ M) |
| 12   | 100 (0.16 $\mu$ M)                  |
| 13   | 100 (0.8 $\mu$ M)                   |
| 14   | 100 (0.8 $\mu$ M)                   |
| 15   | 100 ( $1.3 \times 10^{-3}$ $\mu$ M) |
| 16   | 100 ( $6.4 \times 10^{-3}$ $\mu$ M) |
| 17   | 100 ( $6.4 \times 10^{-3}$ $\mu$ M) |

\*: Reference 6

## 11. Biology

**Plasmids.** To prepare human VDR expression plasmids, the corresponding cDNAs were amplified by PCR with KOD FX Neo (Toyobo) using a set of primers: 5'-TGCTCCTTCAGGGATGGAGGCAAT-3' and 5'-CCACAGGCTGTCCTAGTCAGGAGATCT-3'. Human intestine cDNA was used as a template and subcloned into pBlueScript II cloning vector (Agilent Technologies), and then inserted into the BamHI and XhoI sites of pcDNA3.1/Hygro vector (Invitrogen). To prepare 3x hCYP3A4-ER6-pGL4.10 (VDRE-Luc), a set of oligonucleotides: 5'-TCGAATATGAACTCAAAGGAGGTTCAGTGATATGAACTCAAAGGAGGTTCAGTGATA TGA ACTCAAAGGAGGTTCAGTG-3' and 5'-AGCTCACTGACCTCCTTTGAGTTCATATCACTGACCTCCTTTGAGTTCATATCACTG ACCTCCTTTGAGTTCATAT-3' were annealed and inserted into the XhoI and HindIII sites of pGL4.10. The sequences and orientations of these plasmids were confirmed by direct sequencing. cDNAs encoding full-length hPPAR $\alpha$  and  $\delta$  were PCR-cloned and inserted into mammalian expression vector pcDNA3.1 (Invitrogen) according to previous report in which hPPAR $\gamma$  expression vector was prepared.<sup>8</sup>

**Reporter Gene Assays and Co-Activator Recruitment Assay.** Reporter gene assays for FXR, RXR, PPAR $\alpha$ ,  $\delta$ ,  $\gamma$ , LXR $\alpha$ ,  $\beta$ , RAR $\alpha$  and TGR5 were performed as previously described.<sup>6, 9, 10</sup> The luciferase assay for FXR would be summarized as follows; Hep3B cells were seeded onto 96-well plates. After 16-24 hr, cells were transfected with hFXR and hRXR $\alpha$  expression vectors, FXR response element-driven luciferase vector and  $\beta$ -galactosidase control vector. After five hours, the cells were treated with test compounds ( $10^{-12}$  –  $10^{-4}$  M) in the presence of 5 $\mu$ M of chenodeoxycholic acid (CDCA). The cells were then lysed, followed by determination of the luciferase activity. The firefly luciferase activity was normalized to the  $\beta$ -galactosidase activity for each well. To obtain the IC<sub>50</sub> values of each compound, the regression formula was presented by using ImageJ, software capable of generating a 4-parameter logistic curve fit. And as calculated CDCA treatment alone for 100%, IC<sub>50</sub> values were determined. For cell-based luciferase assay of VDR, HEK293T cells were plated in 96-well poly-D-lysine coated plate, and

were transfected with hVDR and hRXR $\alpha$  expression plasmids, VDRE-Luc reporter plasmid and *Renilla* luciferase vector. After 24 hr, the cells were exposed to test compounds or DMSO (N.C.) in DMEM supplemented with 0.5% delipidated serum for 24 hr. Luciferase activities were determined in cell lysates. Firefly luciferase activity was normalized to either that of *Renilla* luciferase for each well.

To evaluate the binding ability of FXR antagonist candidates, LanthaScreen® TR-FRET FXR Coactivator Assay Kit (Thermo Fisher Scientific Inc.) was used as the previous study.<sup>6</sup> Briefly, different concentrations of test compounds ( $4 \times 10^{-11}$  –  $4 \times 10^{-4}$  M) and 0.5  $\mu$ M of GW4064 which is synthesis FXR agonist were mixed with FXR-LBD-Glutathione S-transferase fusion protein, Fluorecein-SRC2-2 coactivator peptide and Lantha-screen Tb-anti GST antibody in 384-well black plate. EnVision® Multilabel Reader (PerkinElmer) was used for detection of the TR-FRET signal. The IC<sub>50</sub> values of each compound were determined by constructing a dose-response curve calculated GW4064 treatment alone for 100% likewise reporter gene assays.

**Real-time RT-PCR assay.** For FXR target gene expression analysis, Huh-7 cells were subcultured in 6-well plates and exposed to analogue **10** in the presence of CDCA (10  $\mu$ M) or GW4064 (1  $\mu$ M) for 24 hr. To evaluate the effect of analogue **10** on pregnane X receptor (PXR) target gene expression, HepG2 cells were treated with both analogue **10** and Rifampicin (10  $\mu$ M) for 48 hr. Total RNA was isolated, and then reversely transcribed into cDNA. mRNA levels of bile salt export pump (BSEP), small heterodimer partner (SHP), organic solute transporter alpha (OST $\alpha$ ), cytochrome P450 subfamily (CYP) 3A4 and glyceraldehyde 3-phosphate dehydrogenase (GAPDH) were quantified by real-time RT-PCR using specific primers. mRNA levels were all normalized to GAPDH mRNA. All values were reported as means  $\pm$  S.D. of triple measurements of each cDNA sample. The specific primers for human BSEP, SHP, CYP3A4 and GAPDH have been reported previously.<sup>6, 11-13</sup> The primer sequences for human OST $\alpha$  are the following: forward: ACCCTGGTGGGCCTGTTT; reverse: CAGAAATGTCTGCTGGGTCATAGA.

**Cell Culture.** Mouse adipocytic 3T3-L1 cells were purchased from Human Science Research Resources Bank, and grown in DMEM containing 10 % fetal bovine serum. Preadipocytes were differentiated into adipocytes for 2 days in DMEM containing 10 µg/ml insulin (Sigma), 1 µM dexamethasone (Sigma), and 0.5 mM 3-isobutyl-1-methylxanthine (Nacalai Tesque). After 2 days, the medium was replaced with DMEM containing insulin (10 µg/ml) alone and changed every 2 days. Oil Red O staining of the lipids in the cells was carried out as described previously.<sup>14</sup>

**Cell Toxicity Assay.** The cell toxicity of each compound to Hep3B cells was determined by the MTT assay which was performed in accordance with the previous report.<sup>15</sup> 3T3-L1 preadipocytes were seeded in 96-well culture plates and then grown in DMEM containing various concentrations of analogue **10** (0-10 µM) for 6 days. The medium with analogue **10** was changed every 2 days. Thereafter, cell toxicity was measured using a Cell Counting Kit-8 (Dojindo).

**Measurement of Intracellular Triacylglycerol Level.** 3T3-L1 preadipocytes were differentiated into adipocytes for 6 days as described above. The intracellular triacylglycerol level was measured by the use of a WAKO LabAssay Triglyceride Kit (Wako Pure Chemical). Protein concentrations were measured with a Pierce BCA Protein Assay Reagent (Thermo Fisher Scientific).

**Statistical Analysis.** All data were presented as means ± standard deviation (SD). To determine significant differences between 2 groups, comparisons were made using the Student's t tests. When compared multiple groups, one-way ANOVA and a Tukey's post-hoc analysis were performed. The significance of differences was defined at  $p < 0.05$ .

## 12. References

- [1] Baoqing, G.; Feng, H.; Cory, K.; Lynn, B.; Peter, K. Synthesis and SAR of 2-arylbenzoxazoles, benzothiazoles and benzimidazoles as inhibitors of lysophosphatidic acid acyltransferase- $\beta$ . *Bioorg. Med. Chem. Lett.*, **2004**, 14, 1455-1459.
- [2] Teno, N.; Gohda, K.; Wanaka, K.; Tsuda, Y.; Akagawa, M.; Akiduki, E.; Araki, M.; Masuda, A.; Otsubo, T.; Yamashita, Y. Novel type of plasmin inhibitors: providing insight into P4 moiety and alternative scaffold to pyrrolopyrimidine. *Bioorg. Med. Chem.*, **2015**, 23, 3696–3704.
- [3] Zhang, P.; Terefenko, E. A.; Bray, J.; Deecher, D.; Fensome, A.; Harrison, J.; Kim, C.; Koury, E.; Mark, L.; McComas, C. C.; Mugford, C. A.; Trybulski, E. J.; Vu, A. T.; Whiteside, G. T.; Mahaney, P. E. 1- or 3-(3-Amino-2-hydroxy-1-phenyl propyl)-1,3-dihydro-2H-benzimidazol-2-ones: potent, selective, and orally efficacious norepinephrine reuptake inhibitors. *J. Med. Chem.*, **2009**, 52, 5703-5711.
- [4] D'Alessandro, P. L.; Corti, C.; Roth, A.; Ugolini, A.; Sava, A.; Montanari, D.; Bianchi, F.; Garland, S. L.; Powney, B.; Koppe, E. L.; Rocheville, M.; Osborne, G.; Perez, P.; de la Fuente, J.; De Los Frailes, M.; Smith, P. W.; Branch, C.; Nash, D.; Watson, S. P. The identification of structurally novel, selective, orally bioavailable positive modulators of mGluR2. *Bioorg. Med. Chem. Lett.*, **2010**, 20, 759-762.
- [5] Gong, B.; Hong, F.; Kohm, C.; Bonham, L.; Klein, P. Synthesis and SAR of 2-arylbenzoxazoles, benzothiazoles and benzimidazoles as inhibitors of lysophosphatidic acid acyltransferase- $\beta$ . *Bioorg. Med. Chem. Lett.*, **2004**, 14, 1455-1459.
- [6] Teno, N.; Iguchi, Y.; Yamashita, Y.; Mori, N.; Une, M.; Nishimaki-Mogami, T.; Gohda, K. Discovery and optimization of benzimidazole derivatives as a novel chemotype of farnesoid X receptor (FXR) antagonists. *Bioorg. Med. Chem.*, **2017**, 25, 1787-1794.
- [7] Kitamura, S.; Hosono, H.; Miura, S.; Aoki, K. Preparation of azole compounds as FXR inhibitors. Jpn. Kokai Tokkyo Koho (2008), JP 2008273847. 13 Nov 2008.
- [8] Nishimaki-Mogami, T.; Tamehiro, N.; Sato, Y.; Okuhira, K.; Sai, K.; Kagechika, H.; Shudo, K.; Abe-Dohmae, S.; Yokoyama, S.; Ohno, Y.; Inoue, K.; Sawada, J. The RXR agonists PA024 and HX630 have different abilities to activate LXR/RXR and to induce ABCA1 expression in macrophage cell lines. *Biochem. Pharmacol.*, **2008**, 76, 1006-1013.
- [9] Tamehiro, N.; Sato, Y.; Suzuki, T.; Hashimoto, T.; Asakawa, Y.; Yokoyama, S.; Kawanishi, S.; Ohno, Y.; Inoue, K.; Nagao, T.; Nishimaki-Mogami, T.; Riccardin C. A natural product that functions as a liver X receptor (LXR) $\alpha$  agonist and an LXR $\beta$  antagonist. *FEBS Lett.*, **2005**, 579, 5299-5304.
- [10] Iguchi, Y.; Yamaguchi, M.; Sato, H.; Kihira, K.; Nishimaki-Mogami, T.; Une, M.; Bile alcohols function as the ligands of membrane-type bile acid-activated G protein-coupled receptor. *J. Lipid Res.*, **2010**, 51, 1432-41.

- [11] Nishimaki-Mogami, T.; Une, M.; Fujino, T.; Sato, Y.; Tamehiro, N.; Kawahara, Y.; Shudo, K.; Inoue, K. Identification of intermediates in the bile acid synthetic pathway as ligands for the farnesoid X receptor. *J. Lipid Res.* **2004**, *45*, 1538-1545.
- [12] Yu, J.; Lo J. L.; Huang, L.; Zhao, A.; Metzger, E.; Adams, A.; Meinke, P. T.; Wright, S. D.; Cui, J. Lithocholic acid decreases expression of bile salt export pump through farnesoid X receptor antagonist activity. *J. Biol. Chem.*, **2002**, *277*, 31441-31447.
- [13] Faucette, SR.; Zhang, TC.; Moore, R.; Sueyoshi, T.; Omiecinski, CJ.; LeCluyse, EL.; Negishi, M.; Wang, H. Relative activation of human pregnane X receptor versus constitutive androstane receptor defines distinct classes of CYP2B6 and CYP3A4 inducers. *J. Pharmacol. Exp. Ther.*, **2007**, *320*, 72-80.
- [14] Nakao, Y.; Yoshihara, H.; Fujimori, K., Suppression of very early stage of adipogenesis by baicalein, a plant-derived flavonoid through reduced Akt-C/EBPalpha-GLUT4 signaling-mediated glucose uptake in 3T3-L1 adipocytes. *PLoS One.* **2016**, *11*, e0163640.
- [15] Riss, T. L.; Moravec, R. A.; Niles, A. L.; Duellman, S.; Benink, H. A.; Worzella, T. J.; Minor, L., Cell Viability Assays. Assay Guidance Manual [Internet], Sittampalam, G. S.; Coussens, N. P.; Brimacombe, K.; Grossman, A.; Arkin, M.; Auld, D.; Austin, C.; Baell, J.; Bejcek, B.; Chung, T. D. Y.; Dahlin, J. L.; Devanaryan, V.; Foley, T. L.; Glicksman, M.; Hall, M. D.; Hass, J. V.; Inglese, J.; Iversen, P. W.; Lal-Nag, M.; Li, Z.; McGee, J.; McManus, O.; Riss, T.; Trask, O. J. Jr.; Weidner, J. R.; Xia, M.; Xu, X., Eds.; Eli Lilly & Company and the National Center for Advancing Translational Sciences: Bethesda (MD), 2004-2013, pp305-336.
